# Supplementary material
Source: bioRxiv or medRxiv preprint supplement (https://www.biorxiv.org/highwire/filestream/90597/field_highwire_adjunct_files/0/294447-1.pdf)
Supplement: Supplementary file [file 294447-1.pdf]

| Rank | Base# | %GC | ss-count | Probe sequence  | probe len | Tm | $\Delta G_{\text{bimol}}$ | $\Delta G_{\text{unimol}}$ | $\Delta G_{\text{duplex}}$ | Molecular beacon sequence |
|------|-------|-----|----------|-----------------|-----------|----|---------------------------|----------------------------|----------------------------|---------------------------|
| 1    | 1230  | 42  | 0.919    | GAAUCGUUGUAGGU  | 14        | 57 | -2.2                      | 0                          | -20.9                      | CGCGAGAAUCGUUGUAGGUUCGCG  |
| 2    | 1231  | 42  | 0.869    | AGAAUCGUUGUAGG  | 14        | 57 | -2.2                      | 0                          | -20.8                      | GCACGAGAAUCGUUGUAGGCGUGC  |
| 3    | 1229  | 35  | 0.859    | AAUCGUUGUAGGUU  | 14        | 55 | -1.8                      | -0.2                       | -18.9                      | CCGAAUCGUUGUAGGUUCGG      |
| 4    | 84    | 35  | 0.834    | UAAUAGGUUUUGGC  | 14        | 55 | 0                         | 0                          | -19.1                      | CGACGUAAUAGGUUUUGGCCGUGC  |
| 5    | 83    | 42  | 0.825    | AAUAGGUUUUGGCG  | 14        | 58 | -2.7                      | 0                          | -20.2                      | CGACGAAUAGGUUUUGGCCGCGUGC |
| 6    | 76    | 42  | 0.823    | UUUGGCGGAAGUUAU | 14        | 60 | -7.1                      | 0                          | -21.2                      | CGACGUUUGGCCGGAAGUAUCGUGC |
| 7    | 75    | 42  | 0.820    | UUGGCGGAAGUAAU  | 14        | 60 | -5.3                      | 0                          | -21.2                      | CGAGCUUGGCCGGAAGUAUUGCUCG |
| 8    | 82    | 50  | 0.818    | AUAGGUUUUGGCGG  | 14        | 63 | -2.7                      | 0                          | -22.6                      | CGACGAUAGGUUUUGGCCGCGUGC  |
| 9    | 1232  | 42  | 0.816    | GAGAAUCGUUGUAG  | 14        | 54 | -2.7                      | 0                          | -20.4                      | GCACGAGAAUCGUUGUAGCGUGC   |
| 10   | 1233  | 35  | 0.813    | AGAGAAUCGUUGUA  | 14        | 54 | -2.7                      | 0                          | -19.4                      | GCACGAGAGAAUCGUUGUACGUGC  |
| 11   | 81    | 50  | 0.809    | UAGGUUUUGGCGGA  | 14        | 64 | -4.1                      | 0                          | -23.4                      | CCGGUAGGUUUUGGCCGACCGG    |
| 12   | 1234  | 42  | 0.809    | CAGAGAAUCGUUGU  | 14        | 56 | -5.8                      | 0                          | -20.7                      | GCACGCAGAGAAUCGUUGUCGUGC  |
| 13   | 80    | 50  | 0.802    | AGGUUUUGGCCGAA  | 14        | 64 | -5.9                      | 0                          | -23                        | CGACGAGGUUUUGGCCGGAACGUGC |
| 14   | 1228  | 42  | 0.795    | AUCGUUGUAGGUUC  | 14        | 57 | -0.2                      | 0                          | -20.9                      | GCACGAUCGUUGUAGGUUCCGUGC  |
| 15   | 74    | 50  | 0.795    | UGGCGGAAGUAUUG  | 14        | 62 | -2.7                      | 0                          | -22.9                      | CGCGAUGGCCGGAAGUAUUGUCGCG |
| 16   | 1227  | 50  | 0.790    | UCGUUGUAGGUUCC  | 14        | 62 | -3.4                      | 0                          | -23.1                      | GCACGUCGUUGUAGGUUCCCGUGC  |
| 17   | 1226  | 50  | 0.788    | CGUUGUAGGUUCCA  | 14        | 61 | -6.4                      | 0                          | -22.8                      | GCACGCGUUGUAGGUUCCACGUGC  |
| 18   | 2585  | 42  | 0.781    | ACGGAAACAGAAAG  | 14        | 56 | -1.5                      | 0                          | -20.2                      | CGAGCACGGAAACAGAAAGGCUCG  |
| 19   | 854   | 50  | 0.774    | UUAUCUUGGGCACG  | 14        | 62 | -2.7                      | 0                          | -22.9                      | CGCGAUUAUCUUGGGCACGUCGCG  |
| 20   | 855   | 50  | 0.774    | GUUAUCUUGGGCAC  | 14        | 61 | -2.8                      | 0                          | -23.2                      | CCGGUUAUCUUGGGCACCGG      |
| 21   | 2812  | 35  | 0.767    | AGCUUGUUAUAGGA  | 14        | 57 | -7                        | 0                          | -20.1                      | GCACGAGCUUGUUAUAGGACGUGC  |
| 22   | 2233  | 42  | 0.765    | UUUUGGGAAAAGCG  | 14        | 57 | -2.7                      | 0                          | -19.8                      | CGCGAUUUUGGGAAAAGCGUCGCG  |
| 23   | 2813  | 42  | 0.765    | CAGCUUGUUAUAGG  | 14        | 56 | -4.8                      | 0                          | -20.8                      | CGAGCAGCUUGUUAUAGGCUCG    |
| 24   | 2811  | 42  | 0.765    | GCUUGUUAUAGGAC  | 14        | 57 | -7                        | 0                          | -21.2                      | CGAGGCUUGUUAUAGGACCUCG    |
| 25   | 2816  | 35  | 0.760    | UUGCAGCUUGUUAU  | 14        | 56 | -5.9                      | 0                          | -19.5                      | GCACGUUGCAGCUUGUUAUCGUGC  |
| 26   | 2826  | 35  | 0.758    | GGAUUUUACAUUGC  | 14        | 52 | -1.1                      | 0                          | -18.5                      | CGAGGGAUUUUACAUUGCCUCG    |
| 27   | 2814  | 42  | 0.758    | GCAGCUUGUUAUAG  | 14        | 57 | -5.1                      | 0                          | -20.9                      | GCACGGCAGCUUGUUAUAGCGUGC  |
| 28   | 2815  | 35  | 0.758    | UGCAGCUUGUUAUA  | 14        | 57 | -5.9                      | 0                          | -19.9                      | GCCGUGCAGCUUGUUAUACGGC    |
| 29   | 2586  | 35  | 0.756    | AACGGAAACAGAAA  | 14        | 54 | -1.5                      | 0                          | -18.5                      | CGAGCAACGGAAACAGAAAGCUCG  |
| 30   | 2823  | 35  | 0.753    | UUUACAUUGCAGC   | 14        | 54 | -4.9                      | 0                          | -18.8                      | GCACGUUUUACAUUGCAGCCGUGC  |
| 31   | 2822  | 35  | 0.751    | UUUACAUUGCAGCU  | 14        | 56 | -4.9                      | 0                          | -19.5                      | GCACGUUUACAUUGCAGCUCGUGC  |
| 32   | 2584  | 42  | 0.749    | CGGAAACAGAAAGA  | 14        | 56 | -0.9                      | 0                          | -20.4                      | CGAGCCGGAAACAGAAAGAGCUCG  |
| 33   | 1235  | 50  | 0.747    | GCAGAGAAUCGUUG  | 14        | 59 | -5                        | 0                          | -22.4                      | GCACGGCAGAGAAUCGUUGCGUGC  |
| 34   | 399   | 42  | 0.747    | UUGCUGUUGUAGGU  | 14        | 61 | -3.6                      | -0.9                       | -21.8                      | GCACGUUGCUGUUGUAGGUCGUGC  |
| 35   | 2232  | 50  | 0.744    | UUUGGGAAAAGCGG  | 14        | 62 | -2.7                      | 0                          | -22.2                      | CGCGAUUUUGGGAAAAGCGGUCGCG |
| 36   | 72    | 50  | 0.740    | GCGGAAGUAUUGGU  | 14        | 63 | -2.7                      | 0                          | -23                        | CGCGAGCGGAAGUAUUGGUUCGCG  |
| 37   | 856   | 50  | 0.740    | CGUUAUCUUGGGCA  | 14        | 62 | -2.8                      | 0                          | -22.9                      | CGACGCGUUAUCUUGGGCACGUGC  |
| 38   | 1638  | 35  | 0.737    | CGGAUAAACUUGUU  | 14        | 52 | -2.4                      | 0                          | -18.1                      | GCACGCGGAUAAACUUGUUCGUGC  |
| 39   | 2215  | 35  | 0.735    | AGUUUGAAGAGAAG  | 14        | 52 | -0.6                      | 0                          | -18.9                      | CGACGAGUUUGAAGAGAAGCGUGC  |
| 40   | 2225  | 35  | 0.735    | AAAGCGGAAAAGUU  | 14        | 55 | -2.7                      | 0                          | -18.2                      | CCGAAAGCGGAAAAGUUCGG      |
| 41   | 2587  | 35  | 0.733    | AAACGGAAACAGAA  | 14        | 54 | -1.5                      | 0                          | -18.5                      | CGAGCAAACGGAAACAGAAGCUCG  |
| 42   | 2228  | 42  | 0.733    | GGAAAAGCGGAAAA  | 14        | 58 | -2.7                      | 0                          | -20.1                      | CGAGCGGAAAAGCGGAAAAGCUCG  |
| 43   | 2227  | 42  | 0.733    | GAAAAGCGGAAAAG  | 14        | 55 | -2.7                      | 0                          | -19.4                      | CGAGCGAAAAGCGGAAAAGGCUCG  |

| Rank | Base# | %GC | ss-count | Probe sequence  | probe len | Tm | $\Delta G_{\text{bimol}}$ | $\Delta G_{\text{unimol}}$ | $\Delta G_{\text{duplex}}$ | Molecular beacon sequence   |
|------|-------|-----|----------|-----------------|-----------|----|---------------------------|----------------------------|----------------------------|-----------------------------|
| 44   | 2226  | 35  | 0.733    | AAAAGCGGAAAAGU  | 14        | 55 | -2.7                      | 0                          | -18.2                      | CGCCAAAAGCGGAAAAGUGGCG      |
| 45   | 2224  | 35  | 0.733    | AAGCGGAAAAGUUU  | 14        | 55 | -2.7                      | -0.4                       | -18.2                      | CCGAAGCGGAAAAGUUUCGG        |
| 46   | 401   | 42  | 0.733    | UGUUGCUGUUGUAG  | 14        | 58 | -2.8                      | -0.5                       | -21.1                      | GCACGUGUUGCUGUUGUAGCGUGC    |
| 47   | 400   | 50  | 0.733    | GUUGCUGUUGUAGG  | 14        | 61 | -3.6                      | -0.9                       | -22.8                      | GCACGGUUGCUGUUGUAGGCGUGC    |
| 48   | 2231  | 50  | 0.726    | UUGGAAAAGCGGA   | 14        | 64 | -2.7                      | 0                          | -23.2                      | CCGGUUGGAAAAGCGGACCGG       |
| 49   | 2229  | 50  | 0.726    | GGGAAAAGCGGAAA  | 14        | 62 | -2.7                      | 0                          | -22.5                      | CGAGCGGAAAAGCGGAAAGCUCG     |
| 50   | 1225  | 50  | 0.724    | GUUGUAGGUUCCAC  | 14        | 61 | -6.4                      | 0                          | -23.1                      | CCGGUUGUAGGUUCCACCGG        |
| 1    | 1230  | 40  | 0.871    | AGAAUCGUUGUAGGU | 15        | 60 | -2.2                      | 0                          | -22.5                      | CGCCAGAAUCGUUGUAGGUGGCG     |
| 2    | 1229  | 40  | 0.867    | GAAUCGUUGUAGGUU | 15        | 58 | -2.6                      | -0.6                       | -21.8                      | CGCGAGAAUCGUUGUAGGUUUCGCG   |
| 3    | 85    | 33  | 0.843    | GAUAAUAGGUUUUGG | 15        | 53 | 0                         | 0                          | -19.7                      | CGACGGAUAAUAGGUUUUGGCGUCG   |
| 4    | 84    | 33  | 0.830    | AUAAUAGGUUUUGGC | 15        | 56 | 0                         | 0                          | -20.2                      | CGACGAUAAUAGGUUUUGGCCGUCG   |
| 5    | 75    | 40  | 0.828    | UUUGCGGAAGUAUU  | 15        | 61 | -7.1                      | 0                          | -22.1                      | CGACGUUUGCGGAAGUAUUCGUCG    |
| 6    | 1231  | 46  | 0.824    | GAGAAUCGUUGUAGG | 15        | 59 | -2.7                      | 0                          | -23.7                      | GCACGGAGAAUCGUUGUAGGCGUGC   |
| 7    | 83    | 40  | 0.822    | UAAUAGGUUUUGGCG | 15        | 59 | -2.7                      | 0                          | -21.5                      | CGCGAUAAUAGGUUUUGGCGUCGCG   |
| 8    | 82    | 46  | 0.819    | AAUAGGUUUUGGCGG | 15        | 63 | -2.7                      | 0                          | -23.5                      | CGACGAUAGGUUUUGGCGGCGUCG    |
| 9    | 1232  | 40  | 0.817    | AGAGAAUCGUUGUAG | 15        | 57 | -2.7                      | 0                          | -22                        | GCACGAGAGAAUCGUUGUAGCGUGC   |
| 10   | 1233  | 40  | 0.815    | CAGAGAAUCGUUGUA | 15        | 57 | -5.8                      | 0                          | -22                        | GCACGCAGAGAAUCGUUGUACGUGC   |
| 11   | 81    | 46  | 0.813    | AUAGGUUUUGGCGGA | 15        | 65 | -4.1                      | 0                          | -24.5                      | CGACGAUAGGUUUUGGCGGACGUCG   |
| 12   | 80    | 46  | 0.806    | UAGGUUUUGGCGGAA | 15        | 65 | -5.9                      | 0                          | -24.3                      | CCGGUAGGUUUUGGCGGAACCGG     |
| 13   | 74    | 46  | 0.804    | UUGGCGGAAGUAUUG | 15        | 62 | -5.3                      | 0                          | -23.8                      | CGCGAUUGGCGGAAGUAUUGUCGCG   |
| 14   | 1228  | 40  | 0.802    | AAUCGUUGUAGGUUC | 15        | 58 | -2                        | -0.3                       | -21.8                      | GCACGAUCGUUGUAGGUUCCGUGC    |
| 15   | 1227  | 46  | 0.796    | AUCGUUGUAGGUUCC | 15        | 62 | -3.4                      | 0                          | -24.2                      | GCACGAUCGUUGUAGGUUCCCGUGC   |
| 16   | 1226  | 46  | 0.794    | UCGUUGUAGGUUCCA | 15        | 63 | -6.4                      | 0                          | -24.7                      | GCCGUCGUUGUAGGUUCCACGGC     |
| 17   | 73    | 53  | 0.778    | UGGCGGAAGUAUUGG | 15        | 66 | -2.7                      | 0                          | -26.2                      | CGCGAUGGCGGAAGUAUUGGUCGCG   |
| 18   | 2812  | 40  | 0.776    | CAGCUUGUUAUAGGA | 15        | 59 | -7                        | 0                          | -22.7                      | GCACGCAGCUUGUUAUAGGACGUGC   |
| 19   | 2813  | 46  | 0.774    | GCAGCUUGUUAUAGG | 15        | 62 | -5.1                      | 0                          | -24.2                      | GCACGGCAGCUUGUUAUAGGCGUGC   |
| 20   | 2815  | 33  | 0.774    | UUGCAGCUUGUUAUA | 15        | 57 | -5.9                      | 0                          | -20.8                      | GCCGUUGCAGCUUGUUAUACGGC     |
| 21   | 2811  | 40  | 0.774    | AGCUUGUUAUAGGAC | 15        | 60 | -7                        | 0                          | -22.8                      | GCACGAGCUUGUUAUAGGACCGUGC   |
| 22   | 2824  | 33  | 0.772    | GAUUUUACAUUGCAG | 15        | 52 | -4.5                      | 0                          | -19.4                      | GCACGGAUUUUACAUUGCAGCGUGC   |
| 23   | 2814  | 40  | 0.772    | UGCAGCUUGUUAUAG | 15        | 59 | -5.9                      | 0                          | -22.5                      | CGCGAUGCAGCUUGUUAUAGUCGCG   |
| 24   | 2823  | 33  | 0.770    | AUUUUACAUUGCAGC | 15        | 55 | -4.9                      | 0                          | -19.9                      | GCACGAUUUUACAUUGCAGCCGUGC   |
| 25   | 2585  | 40  | 0.768    | AACGGAAACAGAAAG | 15        | 57 | -1.5                      | 0                          | -21.1                      | CGAGCAACGGAAACAGAAAGGCUCG   |
| 26   | 2825  | 33  | 0.768    | GGAUUUUACAUUGCA | 15        | 55 | -2.9                      | 0                          | -20.1                      | GCACGGGAUUUUACAUUGCACGUGC   |
| 27   | 2822  | 33  | 0.768    | UUUUACAUUGCAGCU | 15        | 57 | -4.9                      | 0                          | -20.4                      | GCACGUUUUACAUUGCAGCUCGUGC   |
| 28   | 2826  | 33  | 0.766    | UGGAUUUUACAUUGC | 15        | 55 | -1.1                      | 0                          | -20.1                      | GCACGUGGAUUUUACAUUGCAGCGUGC |
| 29   | 2232  | 46  | 0.761    | UUUUGGAAAAGCGG  | 15        | 62 | -2.7                      | 0                          | -23.1                      | CGCGAUUUUGGAAAAGCGGUCGCG    |
| 30   | 854   | 53  | 0.761    | GUUAUCUUGGGCACG | 15        | 64 | -2.8                      | 0                          | -25.6                      | CGACGGUUAUCUUGGGCACGCGUCG   |
| 31   | 2215  | 33  | 0.751    | AAGUUUGAAGAGAAG | 15        | 53 | -0.6                      | 0                          | -19.8                      | CGACGAAGUUUGAAGAGAAGCGUCG   |
| 32   | 399   | 46  | 0.751    | GUUGCUGUUGUAGGU | 15        | 63 | -3.6                      | -0.9                       | -24.5                      | CGCGAGUUGCUGUUGUAGGUUCGCG   |
| 33   | 400   | 46  | 0.751    | UGUUGCUGUUGUAGG | 15        | 63 | -3.6                      | -0.9                       | -24.4                      | GCACGUGUUGCUGUUGUAGGCGUGC   |
| 34   | 72    | 53  | 0.748    | GGCGGAAGUAUUGGU | 15        | 67 | -2.7                      | 0                          | -26.3                      | CGCGAGGCGGAAGUAUUGGUUCGCG   |
| 35   | 2227  | 46  | 0.748    | GGAAAAGCGGAAAAG | 15        | 60 | -2.7                      | 0                          | -22.7                      | CGAGCGGAAAAGCGGAAAAGGCUCG   |
| 36   | 2226  | 40  | 0.748    | GAAAAGCGGAAAAGU | 15        | 58 | -2.7                      | 0                          | -21.1                      | CGCGAGAAAAGCGGAAAAGUUCGCG   |

| Rank | Base# | %GC | ss-count | Probe sequence   | probe len | Tm | $\Delta G_{bimol}$ | $\Delta G_{unimol}$ | $\Delta G_{duplex}$ | Molecular beacon sequence  |
|------|-------|-----|----------|------------------|-----------|----|--------------------|---------------------|---------------------|----------------------------|
| 37   | 2586  | 33  | 0.744    | AAACGGAAACAGAAA  | 15        | 55 | -1.5               | 0                   | -19.4               | CGAGCAAACGGAAACAGAAAGCUCG  |
| 38   | 2231  | 46  | 0.744    | UUUGGGAAAAGCGGA  | 15        | 64 | -2.7               | 0                   | -24.1               | CCGGUUUGGGAAAAGCGGACCGG    |
| 39   | 2228  | 46  | 0.742    | GGGAAAAGCGGAAAA  | 15        | 63 | -2.7               | 0                   | -23.4               | CGAGCGGGAAAAGCGGAAAAGCUCG  |
| 40   | 2225  | 33  | 0.742    | AAAAGCGGAAAAGUU  | 15        | 56 | -2.7               | 0                   | -19.1               | CCGAAAAGCGGAAAAGUUCGG      |
| 41   | 2584  | 40  | 0.738    | ACGGAACAGAAAGA   | 15        | 59 | -1.5               | 0                   | -22.1               | CGAGCACGGAAACAGAAAGAGCUCG  |
| 42   | 2230  | 46  | 0.738    | UUGGGAAAAGCGGAA  | 15        | 64 | -2.7               | 0                   | -24.1               | CCGUUGGGAAAAGCGGAACGG      |
| 43   | 2224  | 33  | 0.738    | AAAGCGGAAAAGUUU  | 15        | 56 | -2.8               | -0.7                | -19.1               | GGAAAGCGGAAAAGUUUCC        |
| 44   | 2229  | 46  | 0.735    | UGGAAAAGCGGAAA   | 15        | 64 | -2.7               | 0                   | -24.1               | CCGGUGGGAAAAGCGGAAACCGG    |
| 45   | 1225  | 53  | 0.735    | CGUUGUAGGUUCCAC  | 15        | 64 | -6.4               | 0                   | -25.5               | GCACGCGUUGUAGGUUCCACCGUGC  |
| 46   | 973   | 33  | 0.731    | GGUAGAAUUGUUGA   | 15        | 54 | 0                  | 0                   | -20.2               | GCACGGUAGAAUUGUUGACGUGC    |
| 47   | 974   | 33  | 0.729    | UGGUAGAAUUGUUG   | 15        | 54 | 0                  | 0                   | -19.9               | CGCGAUGGUAGAAUUGUUGUCGCG   |
| 48   | 855   | 53  | 0.729    | CGUUAUCUUGGGCAC  | 15        | 64 | -2.8               | 0                   | -25.6               | CGACGCGUUAUCUUGGGCACCGUGC  |
| 49   | 853   | 53  | 0.725    | UUAUCUUGGGCACGG  | 15        | 66 | -2.7               | 0                   | -26.2               | CGCGAUUAUCUUGGGCACGGUCGCG  |
| 50   | 972   | 33  | 0.720    | GUAGAAUUGUUGAG   | 15        | 52 | 0                  | 0                   | -19.5               | GCACGGUAGAAUUGUUGAGCGUGC   |
| 1    | 85    | 31  | 0.833    | AGAUAAUAGGUUUUGG | 16        | 56 | 0                  | 0                   | -21.3               | CGACGAGAUAAUAGGUUUUGGCGUGC |
| 2    | 84    | 37  | 0.829    | GAUAAUAGGUUUUGGC | 16        | 59 | 0                  | 0                   | -23.1               | CGAGGAUAAUAGGUUUUGGCCUCG   |
| 3    | 1230  | 43  | 0.829    | GAGAAUCGUUGUAGGU | 16        | 62 | -2.7               | 0                   | -25.4               | CGCGAGAGAAUCGUUGUAGGUUCGCG |
| 4    | 1231  | 43  | 0.825    | AGAGAAUCGUUGUAGG | 16        | 62 | -2.7               | 0                   | -25.3               | GCACGAGAGAAUCGUUGUAGGCGUGC |
| 5    | 1229  | 37  | 0.825    | AGAAUCGUUGUAGGUU | 16        | 60 | -2.6               | -0.6                | -23.4               | CGCCAGAAUCGUUGUAGGUUGGCG   |
| 6    | 83    | 37  | 0.819    | AUAAUAGGUUUUGGCG | 16        | 59 | -2.7               | 0                   | -22.6               | CGACGAUAAUAGGUUUUGGCGGUGC  |
| 7    | 1232  | 43  | 0.819    | CAGAGAAUCGUUGUAG | 16        | 59 | -5.8               | 0                   | -24.6               | CGAGCAGAGAAUCGUUGUAGCUCG   |
| 8    | 82    | 43  | 0.817    | UAAUAGGUUUUGGCGG | 16        | 64 | -2.7               | 0                   | -24.8               | CGCGAUAAUAGGUUUUGGCGGUCGCG |
| 9    | 81    | 43  | 0.815    | AAUAGGUUUUGGCGGA | 16        | 65 | -4.1               | 0                   | -25.4               | CGACGAAUAGGUUUUGGCGGACGUGC |
| 10   | 74    | 43  | 0.813    | UUUGGCGGAAGUAUUG | 16        | 63 | -7.1               | 0                   | -24.7               | CGCGAUUUGGCGGAAGUAUUGUCGCG |
| 11   | 80    | 43  | 0.810    | AUAGGUUUUGGCGGAA | 16        | 65 | -5.9               | 0                   | -25.4               | CGACGAUAGGUUUUGGCGGAACGUGC |
| 12   | 1227  | 43  | 0.802    | AAUCGUUGUAGGUUCC | 16        | 63 | -3.4               | -0.3                | -25.1               | GCACGAAUCGUUGUAGGUUCCCGUGC |
| 13   | 1226  | 43  | 0.798    | AUCGUUGUAGGUUCCA | 16        | 64 | -6.4               | 0                   | -25.8               | GCACGAUCGUUGUAGGUUCCACGUGC |
| 14   | 73    | 50  | 0.788    | UUGGCGGAAGUAUUGG | 16        | 66 | -5.3               | 0                   | -27.1               | CGCGAUUGGCGGAAGUAUUGGUCGCG |
| 15   | 2813  | 43  | 0.786    | UGCAGCUUGUUAUAGG | 16        | 64 | -5.9               | 0                   | -25.8               | CGCGAUGCAGCUUGUUAUAGGUCGCG |
| 16   | 2814  | 37  | 0.786    | UUGCAGCUUGUUAUAG | 16        | 60 | -5.9               | 0                   | -23.4               | GCACGUUGCAGCUUGUUAUAGCGUGC |
| 17   | 2812  | 43  | 0.784    | GCAGCUUGUUAUAGGA | 16        | 64 | -7                 | 0                   | -26.1               | GCACGGCAGCUUGUUAUAGGACGUGC |
| 18   | 2822  | 31  | 0.782    | AUUUUACAUUGCAGCU | 16        | 58 | -4.9               | 0                   | -21.5               | CGCCAUUUUACAUUGCAGCUGGCG   |
| 19   | 2811  | 43  | 0.782    | CAGCUUGUUAUAGGAC | 16        | 62 | -7                 | 0                   | -25.4               | GCACGCAGCUUGUUAUAGGACCGUGC |
| 20   | 2823  | 37  | 0.780    | GAUUUUACAUUGCAGC | 16        | 58 | -4.9               | 0                   | -22.8               | CGAGGAUUUUACAUUGCAGCCUCG   |
| 21   | 2824  | 37  | 0.778    | GGAUUUUACAUUGCAG | 16        | 57 | -4.5               | 0                   | -22.7               | GCACGGGAUUUUACAUUGCAGCGUGC |
| 22   | 2826  | 31  | 0.774    | UUGGAUUUUACAUUGC | 16        | 56 | -1.1               | 0                   | -21                 | GCACGUUGGAUUUUACAUUGCCGUGC |
| 23   | 2825  | 31  | 0.774    | UGGAUUUUACAUUGCA | 16        | 57 | -2.9               | 0                   | -21.7               | CCGUGGAUUUUACAUUGCACGG     |
| 24   | 399   | 43  | 0.766    | UGUUGCUGUUGUAGGU | 16        | 65 | -3.6               | -0.9                | -26.1               | GCACGUGUUGCUGUUGUAGGUCGUGC |
| 25   | 2226  | 43  | 0.762    | GGAAAAGCGGAAAAGU | 16        | 63 | -2.7               | 0                   | -24.4               | CGCGAGGAAAAGCGGAAAAGUUCGCG |
| 26   | 2215  | 31  | 0.760    | AAAGUUUGAAGAGAAG | 16        | 54 | -0.6               | 0                   | -20.7               | CGACGAAAGUUUGAAGAGAAGCGUGC |
| 27   | 2231  | 43  | 0.760    | UUUUGGGAAAAGCGGA | 16        | 64 | -2.7               | 0                   | -25                 | CCGGUUUUGGGAAAAGCGGACCGG   |
| 28   | 72    | 50  | 0.758    | UGGCGGAAGUAUUGGU | 16        | 68 | -2.7               | 0                   | -27.9               | CGAGCUGGCGGAAGUAUUGGUCGUGC |
| 29   | 2585  | 37  | 0.756    | AAACGGAAACAGAAAG | 16        | 58 | -1.5               | 0                   | -22                 | CGAGCAAACGGAAACAGAAAGGCUCG |

| Rank | Base# | %GC | ss-count | Probe sequence    | probe len | Tm | ΔGbimol | ΔGunimol | ΔGduplex | Molecular beacon sequence    |
|------|-------|-----|----------|-------------------|-----------|----|---------|----------|----------|------------------------------|
| 30   | 2227  | 50  | 0.756    | GGGAAAAGCGGAAAAG  | 16        | 65 | -2.7    | 0        | -26      | CGAGCGGGAAAAGCGGAAAAGGCUCG   |
| 31   | 2225  | 37  | 0.756    | GAAAAGCGGAAAAGUU  | 16        | 58 | -2.7    | 0        | -22      | CGCGAGAAAAGCGGAAAAGUUUCGCG   |
| 32   | 2230  | 43  | 0.754    | UUUGGGAAAAGCGGAA  | 16        | 64 | -2.7    | 0        | -25      | CCGUUUUGGGAAAAGCGGAACGG      |
| 33   | 2229  | 43  | 0.752    | UUGGGAAAAGCGGAAA  | 16        | 64 | -2.7    | 0        | -25      | CCGUUGGGAAAAGCGGAAACGG       |
| 34   | 2228  | 43  | 0.750    | UGGGAAAAGCGGAAAA  | 16        | 64 | -2.7    | 0        | -25      | CCGGUGGGAAAAGCGGAAAACCGG     |
| 35   | 1225  | 50  | 0.744    | UCGUUGUAGGUUCCAC  | 16        | 66 | -6.4    | 0        | -27.4    | GCACGUCGUUGUAGGUUCCACCGUGC   |
| 36   | 2224  | 31  | 0.744    | AAAAGCGGAAAAGUUU  | 16        | 56 | -2.8    | -0.7     | -20      | GGAAAAGCGGAAAAGUUUCC         |
| 37   | 973   | 31  | 0.738    | UGGUAGAAAUUGUUGA  | 16        | 57 | 0       | 0        | -21.8    | GCCGUGGUAGAAAUUGUUGACGGC     |
| 38   | 91    | 31  | 0.738    | GACUUAAGAUAAUAGG  | 16        | 53 | -5.4    | 0        | -21.3    | CGAGCGACUUAAGAUAAUAGGGCUCG   |
| 39   | 2217  | 31  | 0.728    | GAAAAGUUUGAAGAGA  | 16        | 54 | -1.4    | 0        | -21      | CGACGAAAAGUUUGAAGAGACGUCG    |
| 40   | 2584  | 37  | 0.728    | AACGGAAACAGAAAGA  | 16        | 59 | -1.5    | 0        | -23      | CGAGCAACGGAAACAGAAAGAGCUCG   |
| 41   | 2815  | 31  | 0.726    | AUUGCAGCUUGUUAUA  | 16        | 58 | -5.9    | 0        | -21.9    | GCACGAUUGCAGCUUGUUAUACGUGC   |
| 42   | 2810  | 37  | 0.726    | AGCUUGUUUAGGACA   | 16        | 62 | -7      | -0.3     | -24.4    | GCACGAGCUUGUUUAGGACACGUGC    |
| 43   | 1638  | 31  | 0.724    | UUCGGAAUAAACUUGUU | 16        | 56 | -4.1    | 0        | -20.9    | GCACGUUCGGAAUAAACUUGUUCGUGC  |
| 44   | 2821  | 31  | 0.724    | UUUUACAUUGCAGCUU  | 16        | 58 | -4.9    | 0        | -21.3    | GCACGUUUUACAUUGCAGCUUCGUGC   |
| 45   | 972   | 37  | 0.722    | GGUAGAAAUUGUUGAG  | 16        | 57 | 0       | 0        | -22.8    | GCACGGGUAGAAAUUGUUGAGCGUGC   |
| 46   | 92    | 31  | 0.716    | GGACUUAAGAUAAUAG  | 16        | 53 | -5.4    | 0        | -21.3    | CGAGCGGACUUAAGAUAAUAGGCUCG   |
| 47   | 2218  | 37  | 0.714    | GGAAAAGUUUGAAGAG  | 16        | 56 | -1.4    | 0        | -22.4    | CGACGGGAAAAGUUUGAAGAGCGUCG   |
| 48   | 2214  | 31  | 0.712    | AAGUUUGAAGAGAAGU  | 16        | 56 | -0.6    | 0        | -21.5    | CGCCAAGUUUGAAGAGAAGUGGCG     |
| 49   | 2223  | 37  | 0.706    | AAAGCGAAAAGUUUG   | 16        | 58 | -4.4    | -1.5     | -21.7    | CGACGAAAGCGAAAAGUUUGCGUCG    |
| 50   | 398   | 50  | 0.704    | GUUGCUGUUGUAGGUG  | 16        | 65 | -3.6    | -0.9     | -27.1    | GCACGGUUGCUGUUGUAGGUGCGUGC   |
| 1    | 1230  | 41  | 0.829    | AGAGAAUCGUUGUAGGU | 17        | 64 | -2.7    | 0        | -27      | CGCCAGAGAAUCGUUGUAGGUGGCG    |
| 2    | 1231  | 47  | 0.825    | CAGAGAAUCGUUGUAGG | 17        | 63 | -5.8    | 0        | -27.9    | CGAGCAGAGAAUCGUUGUAGGCUCG    |
| 3    | 84    | 35  | 0.820    | AGAUAAUAGGUUUUGGC | 17        | 61 | 0       | 0        | -24.7    | CGACGAGAUAAUAGGUUUUGGCCGUCG  |
| 4    | 83    | 41  | 0.818    | GAUAAUAGGUUUUGGCG | 17        | 62 | -2.7    | 0        | -25.5    | CGACGGAUAAUAGGUUUUGGCCGCGUCG |
| 5    | 82    | 41  | 0.814    | AUAAUAGGUUUUGGCGG | 17        | 64 | -2.7    | 0        | -25.9    | CGACGAUAAUAGGUUUUGGCCGCGUCG  |
| 6    | 81    | 41  | 0.812    | UAAUAGGUUUUGGCGGA | 17        | 65 | -4.1    | 0        | -26.7    | CCGGUAAUAGGUUUUGGCCGGACCGG   |
| 7    | 80    | 41  | 0.812    | AAUAGGUUUUGGCGGAA | 17        | 65 | -5.9    | 0        | -26.3    | CGACGAAUAGGUUUUGGCCGGAACGUCG |
| 8    | 1226  | 41  | 0.805    | AAUCGUUGUAGGUUCCA | 17        | 64 | -6.4    | -0.3     | -26.7    | GCACGAAUCGUUGUAGGUUCCACGUGC  |
| 9    | 2813  | 41  | 0.799    | UUGCAGCUUGUUUAGG  | 17        | 64 | -5.9    | 0        | -26.7    | GCACGUUGCAGCUUGUUUAGGCGUGC   |
| 10   | 73    | 47  | 0.797    | UUUGGCGGAAGUUAUGG | 17        | 67 | -7.1    | 0        | -28      | CGCGAUUUGGCGGAAGUUAUGGUCGCG  |
| 11   | 2812  | 41  | 0.795    | UGCAGCUUGUUUAGGA  | 17        | 65 | -7      | 0        | -27.7    | GCCGUGCAGCUUGUUUAGGACGGC     |
| 12   | 2822  | 35  | 0.791    | GAUUUUACAUUGCAGCU | 17        | 60 | -4.9    | 0        | -24.4    | CGCGAGAUUUUACAUUGCAGCUUCGCG  |
| 13   | 2811  | 47  | 0.789    | GCAGCUUGUUUAGGAC  | 17        | 66 | -7      | 0        | -28.8    | CGAGGCAGCUUGUUUAGGACCUCG     |
| 14   | 1229  | 41  | 0.787    | GAGAAUCGUUGUAGGUU | 17        | 62 | -2.7    | -0.6     | -26.3    | CGCGAGAGAAUCGUUGUAGGUUUCGCG  |
| 15   | 2823  | 41  | 0.786    | GGAUUUUACAUUGCAGC | 17        | 62 | -4.9    | 0        | -26.1    | CGAGGGAUUUUACAUUGCAGCCUCG    |
| 16   | 2824  | 35  | 0.784    | UGGAUUUACAUUGCAG  | 17        | 59 | -4.9    | 0        | -24.3    | GCACGUGGAUUUACAUUGCAGCGUGC   |
| 17   | 2226  | 47  | 0.769    | GGGAAAAGCGGAAAAGU | 17        | 67 | -2.7    | 0        | -27.7    | CGCGAGGGAAAAGCGGAAAAGUUCGCG  |
| 18   | 2230  | 41  | 0.769    | UUUUGGGAAAAGCGGAA | 17        | 64 | -2.7    | 0        | -25.9    | CCGUUUUGGGAAAAGCGGAACGG      |
| 19   | 2225  | 41  | 0.769    | GGAAAAGCGGAAAAGUU | 17        | 63 | -2.7    | 0        | -25.3    | CGCGAGGAAAAGCGGAAAAGUUUCGCG  |
| 20   | 72    | 47  | 0.769    | UUGGCGGAAGUAUUGGU | 17        | 68 | -5.3    | 0        | -28.8    | CGAGCUUGGCGGAAGUAUUGGUCUCG   |
| 21   | 2229  | 41  | 0.767    | UUUGGGAAAAGCGGAAA | 17        | 64 | -2.7    | 0        | -25.9    | GGUUUGGGAAAAGCGGAAACC        |
| 22   | 2228  | 41  | 0.765    | UUGGGAAAAGCGGAAAA | 17        | 64 | -2.7    | 0        | -25.9    | CCGUUGGGAAAAGCGGAAAACGG      |

| Rank | Base# | %GC | ss-count | Probe sequence     | probe len | Tm | $\Delta G_{\text{bimol}}$ | $\Delta G_{\text{unimol}}$ | $\Delta G_{\text{duplex}}$ | Molecular beacon sequence    |
|------|-------|-----|----------|--------------------|-----------|----|---------------------------|----------------------------|----------------------------|------------------------------|
| 23   | 2227  | 47  | 0.763    | UGGGAAAAGCGGAAAAG  | 17        | 66 | -2.7                      | 0                          | -27.6                      | CGCGAUGGGAAAAGCGGAAAAGUCGCG  |
| 24   | 2224  | 35  | 0.757    | GAAAAGCGGAAAAGUUU  | 17        | 59 | -2.8                      | -0.7                       | -22.9                      | CGCGAGAAAAGCGGAAAAGUUUUCGCG  |
| 25   | 1225  | 47  | 0.751    | AUCGUUGUAGGUUCCAC  | 17        | 66 | -6.4                      | 0                          | -28.5                      | GCACGAUCGUUGUAGGUUCCACCGUGC  |
| 26   | 2814  | 35  | 0.740    | AUUGCAGCUUGUUUAG   | 17        | 60 | -5.9                      | 0                          | -24.5                      | GCACGAUUGCAGCUUGUUUAGCGUGC   |
| 27   | 2810  | 41  | 0.736    | CAGCUUGUUUAGGACA   | 17        | 63 | -7                        | -0.3                       | -27                        | GCACGCAGCUUGUUUAGGACACGUGC   |
| 28   | 972   | 35  | 0.729    | UGGUAGAAUUGUUGAG   | 17        | 59 | 0                         | 0                          | -24.4                      | CGCGAUGGUAGAAUUGUUGAGUCGCG   |
| 29   | 71    | 52  | 0.729    | UGGCGGAAGUUAUUGGUG | 17        | 70 | -3.2                      | -0.2                       | -30.5                      | CGCGAUGGCGGAAGUUAUUGGUGUCGCG |
| 30   | 2217  | 35  | 0.725    | GGAAAAGUUUGAAGAGA  | 17        | 59 | -1.4                      | 0                          | -24.3                      | CGACGGGAAAAGUUUGAAGAGACGUCG  |
| 31   | 91    | 35  | 0.723    | GGACUUAAGAUAAUAGG  | 17        | 58 | -5.4                      | 0                          | -24.6                      | CGAGCGGACUUAAGAUAAUAGGGCUCG  |
| 32   | 399   | 47  | 0.721    | CUGUUGCUGUUGUAGGU  | 17        | 67 | -3.6                      | -0.9                       | -28.7                      | GCACGCUGUUGCUGUUGUAGGUCGUGC  |
| 33   | 398   | 47  | 0.721    | UGUUGCUGUUGUAGGUG  | 17        | 66 | -3.6                      | -0.9                       | -28.7                      | GCACGUGUUGCUGUUGUAGGUGCGUGC  |
| 34   | 2584  | 35  | 0.719    | AAACGGAAACAGAAAGA  | 17        | 60 | -1.5                      | 0                          | -23.9                      | CGAGCAAACGGAAACAGAAAGAGCUCG  |
| 35   | 2223  | 35  | 0.713    | AAAAGCGGAAAAGUUUG  | 17        | 59 | -4.4                      | -1.5                       | -22.6                      | CGACGAAAAGCGGAAAAGUUUGCGUCG  |
| 36   | 2585  | 41  | 0.712    | CAAACGGAAACAGAAAG  | 17        | 60 | -1.5                      | 0                          | -24.6                      | CGAGCAAACGGAAACAGAAAGCUCG    |
| 37   | 973   | 35  | 0.708    | CUGGUAGAAUUGUUGA   | 17        | 59 | -5                        | 0                          | -24.4                      | GCACGCUGGUAGAAUUGUUGACGUGC   |
| 38   | 1224  | 47  | 0.706    | UCGUUGUAGGUUCCACU  | 17        | 67 | -6.4                      | 0                          | -29                        | GCACGUCGUUGUAGGUUCCACUCGUGC  |
| 39   | 971   | 35  | 0.704    | GGUAGAAUUGUUGAGA   | 17        | 59 | 0                         | 0                          | -24.7                      | GCACGGGUAGAAUUGUUGAGACGUGC   |
| 40   | 852   | 52  | 0.693    | GUUAUCUUGGGCACGGU  | 17        | 70 | -2.8                      | 0                          | -30.6                      | CGCGAGUUAUCUUGGGCACGGUUCGCG  |
| 41   | 2583  | 41  | 0.687    | AACGGAAACAGAAAGAC  | 17        | 62 | -1.5                      | 0                          | -25.7                      | CGAGCAACGGAAACAGAAAGACGUCG   |
| 42   | 1638  | 35  | 0.687    | CUUCGGAUAAACUUGUU  | 17        | 58 | -4.5                      | 0                          | -23.5                      | GCACGCUUCGGAUAAACUUGUUCGUGC  |
| 43   | 585   | 47  | 0.687    | UUGUCGUGCAGUGGAAA  | 17        | 67 | -5.1                      | 0                          | -28.6                      | CCGUUGUCGUGCAGUGGAAACGG      |
| 44   | 1637  | 35  | 0.685    | UUCGGAUAAACUUGUUG  | 17        | 58 | -4.1                      | 0                          | -23.5                      | CGCGAUUCGGAUAAACUUGUUGUCGCG  |
| 45   | 2820  | 35  | 0.685    | UUUUACAUUGCAGCUUG  | 17        | 60 | -4.9                      | 0                          | -23.9                      | GCACGUUUUACAUUGCAGCUUGCGUGC  |
| 46   | 584   | 47  | 0.685    | UGUCGUGCAGUGGAAAU  | 17        | 67 | -5.1                      | 0                          | -28.8                      | GCACGUGUCGUGCAGUGGAAAUUCGUGC |
| 47   | 405   | 47  | 0.685    | GUGUUGCUGUUGCUGUU  | 17        | 67 | -4.1                      | -1.1                       | -28.4                      | CGCGAGUGUUGCUGUUGCUGUUUCGCG  |
| 48   | 2809  | 35  | 0.685    | AGCUUGUUUAGGACAA   | 17        | 62 | -7                        | -1.1                       | -25.3                      | GCACGAGCUUGUUUAGGACAACGUGC   |
| 49   | 92    | 35  | 0.683    | CGGACUUAAGAUAAUAG  | 17        | 57 | -5.4                      | 0                          | -23.7                      | CGAGCGGACUUAAGAUAAUAGCUCG    |
| 50   | 2815  | 35  | 0.683    | CAUUGCAGCUUGUUUAU  | 17        | 60 | -5.9                      | 0                          | -24.5                      | GCACGCAUUGCAGCUUGUUUAUCGUGC  |
| 1    | 1230  | 44  | 0.830    | CAGAGAAUCGUUGUAGGU | 18        | 65 | -5.8                      | 0                          | -29.6                      | GCACGCAGAGAAUCGUUGUAGGUCGUGC |
| 2    | 82    | 44  | 0.814    | GAUAAUAGGUUUUGGCGG | 18        | 66 | -2.7                      | 0                          | -28.8                      | CGACGGAUAAUAGGUUUUGGCGGUCG   |
| 3    | 84    | 33  | 0.810    | AAGAUAAUAGGUUUUGGC | 18        | 61 | -2.4                      | 0                          | -25.6                      | CGACGAAGAUAAUAGGUUUUGGCCGUCG |
| 4    | 83    | 38  | 0.810    | AGAUAAUAGGUUUUGGCG | 18        | 64 | -2.7                      | 0                          | -27.1                      | CGACGAGAUAAUAGGUUUUGGCGGUCG  |
| 5    | 81    | 38  | 0.810    | AUAAUAGGUUUUGGCGGA | 18        | 66 | -4.1                      | 0                          | -27.8                      | CGACGAUAAUAGGUUUUGGCGGACGUCG |
| 6    | 80    | 38  | 0.810    | UAAUAGGUUUUGGCGGAA | 18        | 65 | -5.9                      | 0                          | -27.6                      | CCGGUAAUAGGUUUUGGCGGAACCGG   |
| 7    | 2812  | 38  | 0.806    | UUGCAGCUUGUUUAGGA  | 18        | 66 | -7                        | 0                          | -28.6                      | GCCGUUGCAGCUUGUUUAGGACGGC    |
| 8    | 2811  | 44  | 0.799    | UGCAGCUUGUUUAGGAC  | 18        | 67 | -7                        | 0                          | -30.4                      | GCACGUGCAGCUUGUUUAGGACCGUGC  |
| 9    | 2822  | 38  | 0.796    | GGAUUUUACAUUGCAGCU | 18        | 64 | -4.9                      | 0                          | -27.7                      | CGCGAGGAUUUUACAUUGCAGCUUCGCG |
| 10   | 2824  | 33  | 0.790    | UUGGAUUUUACAUUGCAG | 18        | 60 | -5                        | 0                          | -25.2                      | GCACGUUGGAUUUUACAUUGCAGCGUGC |
| 11   | 2823  | 38  | 0.790    | UGGAUUUUACAUUGCAGC | 18        | 64 | -5.1                      | 0                          | -27.7                      | GCACGUGGAUUUUACAUUGCAGCCGUGC |
| 12   | 1229  | 38  | 0.790    | AGAGAAUCGUUGUAGGUU | 18        | 64 | -2.7                      | -0.6                       | -27.9                      | CGCCAGAGAAUCGUUGUAGGUUGGCG   |
| 13   | 2229  | 38  | 0.780    | UUUUGGGAAAAGCGGAAA | 18        | 65 | -3.8                      | -0.6                       | -26.8                      | GGUUUUGGGAAAAGCGGAAACC       |
| 14   | 2228  | 38  | 0.778    | UUUGGGAAAAGCGGAAAA | 18        | 65 | -2.7                      | 0                          | -26.8                      | GGUUUGGGAAAAGCGGAAACC        |
| 15   | 72    | 44  | 0.778    | UUUGGCGGAAGUAUUGGU | 18        | 68 | -7.1                      | 0                          | -29.7                      | CGACGUUUGGCGGAAGUAUUGGUCGUGC |

| Rank | Base# | %GC | ss-count | Probe sequence      | probe len | Tm | ΔGbimol | ΔGunimol | ΔGduplex | Molecular beacon sequence     |
|------|-------|-----|----------|---------------------|-----------|----|---------|----------|----------|-------------------------------|
| 16   | 2227  | 44  | 0.776    | UUGGGAAAAGCGGAAAAG  | 18        | 66 | -2.7    | 0        | -28.5    | CGCGAUUGGGAAAAGCGGAAAAGUCGCG  |
| 17   | 2226  | 44  | 0.774    | UGGGAAAAGCGGAAAAGU  | 18        | 68 | -2.7    | 0        | -29.3    | CGAGCUGGGAAAAGCGGAAAAGUCGUCG  |
| 18   | 2225  | 44  | 0.774    | GGGAAAAGCGGAAAAGUU  | 18        | 67 | -2.7    | 0        | -28.6    | CGCGAGGGAAAAGCGGAAAAGUUUCGCG  |
| 19   | 2224  | 38  | 0.769    | GGAAAAGCGGAAAAGUUU  | 18        | 63 | -2.8    | -0.7     | -26.2    | CGCGAGGAAAAGCGGAAAAGUUUUCGCG  |
| 20   | 1225  | 44  | 0.760    | AAUCGUUGUAGGUUCCAC  | 18        | 66 | -6.4    | -0.3     | -29.4    | GCACGAAUCGUUGUAGGUUCCACCGUGC  |
| 21   | 2215  | 33  | 0.756    | GAAAAGUUUGAAGAGAAG  | 18        | 57 | -1.4    | 0        | -24.5    | CGACGGAAAAGUUUGAAGAGAAGCGUCG  |
| 22   | 2813  | 38  | 0.754    | AUUGCAGCUUGUUUAGG   | 18        | 64 | -5.9    | 0        | -27.8    | GCACGAUUGCAGCUUGUUUAGGCGUGC   |
| 23   | 2821  | 33  | 0.751    | GAUUUUACAUUGCAGCUU  | 18        | 61 | -4.9    | 0        | -25.3    | CGCGAGAUUUUACAUUGCAGCUUUCGCG  |
| 24   | 2810  | 44  | 0.746    | GCAGCUUGUUUAGGACA   | 18        | 67 | -7      | -0.3     | -30.4    | GCACGGCAGCUUGUUUAGGACACGUGC   |
| 25   | 71    | 50  | 0.740    | UUGGCGGAAGUAUUGGUG  | 18        | 70 | -5.3    | -0.2     | -31.4    | CGCGAUUGGCGGAAGUAUUGGUGUCGCG  |
| 26   | 2216  | 33  | 0.738    | GGAAAAGUUUGAAGAGAA  | 18        | 59 | -1.4    | 0        | -25.2    | CGACGGGAAAAGUUUGAAGAGAAGCGUCG |
| 27   | 90    | 33  | 0.731    | GGACUUAAGAUAAUAGGU  | 18        | 61 | -5.6    | -1       | -26.3    | CGCGAGGACUUAAGAUAAUAGGUUCGCG  |
| 28   | 2223  | 38  | 0.728    | GAAAAGCGGAAAAGUUUG  | 18        | 61 | -4.4    | -1.5     | -25.5    | CGACGGAAAAGCGGAAAAGUUUGCGUCG  |
| 29   | 1224  | 44  | 0.715    | AUCGUUGUAGGUUCCACU  | 18        | 68 | -6.4    | 0        | -30.1    | CGCCAUCGUUGUAGGUUCCACUGGCG    |
| 30   | 971   | 33  | 0.711    | UGGUAGAAUUGUUGAGA   | 18        | 61 | 0       | 0        | -26.3    | GCCGUGGUAGAAUUGUUGAGACGCG     |
| 31   | 2820  | 33  | 0.703    | AUUUUACAUUGCAGCUUG  | 18        | 60 | -4.9    | 0        | -25      | GCACGAUUUUACAUUGCAGCUUGCGUGC  |
| 32   | 584   | 44  | 0.703    | UUGUCGUGCAGUGGAAU   | 18        | 67 | -5.1    | 0        | -29.7    | GCACGUUGUCGUGCAGUGGAAUUCGUGC  |
| 33   | 972   | 38  | 0.701    | CUGGUAGAAUUGUUGAG   | 18        | 61 | -5      | 0        | -27      | CCGCUGGUAGAAUUGUUGAGCGG       |
| 34   | 70    | 55  | 0.701    | UGGCGGAAGUAUUGGUGC  | 18        | 73 | -6.8    | -0.2     | -33.9    | CGAGCUGGCGGAAGUAUUGGUGCUCG    |
| 35   | 2814  | 38  | 0.699    | CAUUGCAGCUUGUUUAG   | 18        | 62 | -5.9    | 0        | -27.1    | CGAGCAUUGCAGCUUGUUUAGCUCG     |
| 36   | 2809  | 38  | 0.697    | CAGCUUGUUUAGGACAA   | 18        | 64 | -7      | -1.1     | -27.9    | GCACGCAGCUUGUUUAGGACAACGUGC   |
| 37   | 405   | 50  | 0.695    | GGUGUUGCUGUUGCUGUU  | 18        | 70 | -4.1    | -1.1     | -31.7    | CGCGAGGUGUUGCUGUUGCUGUUUCGCG  |
| 38   | 91    | 38  | 0.692    | CGGACUUAAGAUAAUAGG  | 18        | 61 | -5.4    | 0        | -27      | CGAGCGGACUUAAGAUAAUAGGCUCG    |
| 39   | 404   | 50  | 0.692    | GUGUUGCUGUUGCUGUUG  | 18        | 68 | -4.1    | -1.1     | -31      | CGAGCGUGUUGCUGUUGCUGUUGGCUCG  |
| 40   | 970   | 33  | 0.690    | GGUAGAAUUGUUGAGAU   | 18        | 60 | -0.6    | 0        | -25.8    | CGCGAGGUAGAAUUGUUGAGAUUCGCG   |
| 41   | 406   | 50  | 0.688    | UGGUGUUGCUGUUGCUGU  | 18        | 71 | -4.1    | -1.1     | -32.4    | CGAGCUGGUGUUGCUGUUGCUGUCUCG   |
| 42   | 403   | 44  | 0.688    | UGUUGCUGUUGCUGUUGU  | 18        | 68 | -4.1    | -1.1     | -30      | GCACGUGUUGCUGUUGCUGUUGUCGUGC  |
| 43   | 2217  | 38  | 0.686    | CGGAAAAGUUUGAAGAGA  | 18        | 61 | -2.4    | 0        | -26.7    | CGACGCGAAAAGUUUGAAGAGACGUCG   |
| 44   | 2222  | 33  | 0.686    | AAAAGCGGAAAAGUUUGA  | 18        | 61 | -4.4    | -1.5     | -24.5    | CGACGAAAAGCGGAAAAGUUUGACGUCG  |
| 45   | 402   | 44  | 0.685    | GUUGCUGUUGCUGUUGUA  | 18        | 67 | -4.1    | -1.1     | -29.7    | GCACGGUUGCUGUUGCUGUUGUACGUGC  |
| 46   | 1242  | 44  | 0.683    | GUUAAUCGUCAGCAGAGA  | 18        | 65 | -3.3    | 0        | -29.9    | GCACGGUUAUCGUCAGCAGAGACGUGC   |
| 47   | 2583  | 38  | 0.681    | AAACGGAAACAGAAAGAC  | 18        | 62 | -1.5    | 0        | -26.6    | CGAGCAAACGGAAACAGAAAGACGCUCG  |
| 48   | 973   | 38  | 0.681    | GCUGGUAGAAUUGUUGA   | 18        | 63 | -5.4    | 0        | -27.8    | GCACGGCUGGUAGAAUUGUUGACGUGC   |
| 49   | 1221  | 50  | 0.681    | GUUGUAGGUUCCACUGGU  | 18        | 70 | -6.4    | -0.5     | -32.3    | CGCGAGUUGUAGGUUCCACUGGUUCGCG  |
| 50   | 1219  | 44  | 0.681    | UGUAGGUUCCACUGGUUA  | 18        | 68 | -6.4    | -0.5     | -30.9    | GCCGUGUAGGUUCCACUGGUUACGCG    |
| 1    | 81    | 42  | 0.810    | GAUAAUAGGUUUUGGCGGA | 19        | 67 | -4.1    | 0        | -30.7    | CGACGGAUAAUAGGUUUUGGCGGACGUCG |
| 2    | 2811  | 42  | 0.810    | UUGCAGCUUGUUUAGGAC  | 19        | 67 | -7      | 0        | -31.3    | GCACGUUGCAGCUUGUUUAGGACCGUGC  |
| 3    | 80    | 36  | 0.808    | AUAAUAGGUUUUGGCGGAA | 19        | 66 | -5.9    | 0        | -28.7    | CGACGAUAAUAGGUUUUGGCGGAACGUCG |
| 4    | 82    | 42  | 0.806    | AGAUAAUAGGUUUUGGCGG | 19        | 67 | -2.7    | 0        | -30.4    | CGACGAGAUAAUAGGUUUUGGCGGCGUCG |
| 5    | 84    | 31  | 0.803    | UAAGAUAAUAGGUUUUGGC | 19        | 62 | -4.6    | -0.4     | -26.9    | CGACGUAAGAUAAUAGGUUUUGGCGGUCG |
| 6    | 83    | 36  | 0.801    | AAGAUAAUAGGUUUUGGCG | 19        | 64 | -3.4    | 0        | -28      | CGACGAAGAUAAUAGGUUUUGGCGGUCG  |
| 7    | 2822  | 36  | 0.800    | UGGAUUUUACAUUGCAGCU | 19        | 66 | -5.1    | 0        | -29.3    | GCACGUGGAUUUUACAUUGCAGCUCGUGC |
| 8    | 2823  | 36  | 0.796    | UUGGAUUUUACAUUGCAGC | 19        | 64 | -5.1    | 0        | -28.6    | GCACGUUGGAUUUUACAUUGCAGCCGUGC |

| Rank | Base# | %GC | ss-count | Probe sequence       | probe len | Tm | $\Delta G_{bimol}$ | $\Delta G_{unimol}$ | $\Delta G_{duplex}$ | Molecular beacon sequence      |
|------|-------|-----|----------|----------------------|-----------|----|--------------------|---------------------|---------------------|--------------------------------|
| 9    | 1229  | 42  | 0.793    | CAGAGAAUCGUUGUAGGUU  | 19        | 65 | -5.8               | -0.6                | -30.5               | GCACGCAGAGAAUCGUUGUAGGUUCGUGC  |
| 10   | 2228  | 36  | 0.789    | UUUUGGGAAAAGCGGAAA   | 19        | 65 | -3.8               | -0.6                | -27.7               | GGUUUUGGGAAAAGCGGAAAACC        |
| 11   | 2227  | 42  | 0.788    | UUUGGGAAAAGCGGAAAAG  | 19        | 66 | -2.7               | 0                   | -29.4               | CGCGAUUUGGGAAAAGCGGAAAAGUCGCG  |
| 12   | 2226  | 42  | 0.786    | UUGGGAAAAGCGGAAAAGU  | 19        | 68 | -2.7               | 0                   | -30.2               | CGAGCUUGGGAAAAGCGGAAAAGUGCUCG  |
| 13   | 2225  | 42  | 0.779    | UGGAAAAGCGGAAAAGUU   | 19        | 68 | -2.7               | 0                   | -30.2               | CGAGCUGGGAAAAGCGGAAAAGUUGCUCG  |
| 14   | 2224  | 42  | 0.774    | GGGAAAAGCGGAAAAGUUU  | 19        | 67 | -2.8               | -0.7                | -29.5               | CGCGAGGGAAAAGCGGAAAAGUUUCGCG   |
| 15   | 2812  | 36  | 0.764    | AUUGCAGCUUGUUAUAGGA  | 19        | 66 | -7                 | 0                   | -29.7               | GCACGAUUGCAGCUUGUUAUAGGACGUGC  |
| 16   | 2821  | 36  | 0.757    | GGAUUUUACAUUGCAGCUU  | 19        | 64 | -4.9               | 0                   | -28.6               | CGCGAGGAUUUUACAUUGCAGCUUUCGCG  |
| 17   | 2824  | 31  | 0.754    | UUUGGAUUUUACAUUGCAG  | 19        | 60 | -5                 | 0                   | -26.1               | GCACGUUUGGAUUUUACAUUGCAGCGUGC  |
| 18   | 2215  | 36  | 0.752    | GGAAAAGUUUGAAGAGAAG  | 19        | 61 | -1.4               | 0                   | -27.8               | CGACGGGAAAAGUUUGAAGAGAAGCGUCG  |
| 19   | 71    | 47  | 0.750    | UUUGGCGGAAGUAUUGGUG  | 19        | 70 | -7.1               | -0.2                | -32.3               | CGCGAUUUGGCGGAAGUAUUGGUGUCGCG  |
| 20   | 2223  | 42  | 0.740    | GGAAAAGCGGAAAAGUUUG  | 19        | 65 | -4.4               | -1.5                | -28.8               | CGACGGGAAAAGCGGAAAAGUUUGCUCG   |
| 21   | 1224  | 42  | 0.725    | AAUCGUUGUAGGUUCCACU  | 19        | 68 | -6.4               | -0.3                | -31                 | CGCCAUCGUUGUAGGUUCCACUGGCG     |
| 22   | 2214  | 31  | 0.723    | GAAAAGUUUGAAGAGAAGU  | 19        | 59 | -1.4               | 0                   | -26.2               | CGCGAGAAAAGUUUGAAGAGAAGUUCGCG  |
| 23   | 2820  | 36  | 0.715    | GAUUUUACAUUGCAGCUUG  | 19        | 62 | -4.9               | 0                   | -27.9               | GCACGGAUUUUACAUUGCAGCUUGCUCG   |
| 24   | 2813  | 42  | 0.715    | CAUUGCAGCUUGUUAUAGG  | 19        | 66 | -5.9               | 0                   | -30.4               | CGAGCAUUGCAGCUUGUUAUAGGCUCG    |
| 25   | 70    | 52  | 0.713    | UUGGCGGAAGUAUUGGUGC  | 19        | 73 | -6.8               | -0.2                | -34.8               | CGAGCUUGGCGGAAGUAUUGGUGCGCUCG  |
| 26   | 405   | 47  | 0.705    | UGGUGUUGCUGUUGCUGUU  | 19        | 71 | -4.1               | -1.1                | -33.3               | CGAGCUGGUGUUGCUGUUGCUGUUGCUCG  |
| 27   | 2216  | 36  | 0.701    | CGGAAAAGUUUGAAGAGAA  | 19        | 62 | -2.4               | 0                   | -27.6               | CGACGCGGAAAAGUUUGAAGAGAACGUCG  |
| 28   | 90    | 36  | 0.701    | CGGACUUAAGAUAAUAGGU  | 19        | 64 | -5.6               | -1                  | -28.7               | CGAGCCGGACUUAAGAUAAUAGGUGCUCG  |
| 29   | 404   | 52  | 0.701    | GGUGUUGCUGUUGCUGUUG  | 19        | 71 | -4.1               | -1.1                | -34.3               | CGAGCGGUGUUGCUGUUGCUGUUGCUCG   |
| 30   | 2222  | 36  | 0.701    | GAAAAGCGGAAAAGUUUGA  | 19        | 63 | -4.4               | -1.5                | -27.4               | CGACGGAAAAGCGGAAAAGUUUGACGUCG  |
| 31   | 970   | 31  | 0.698    | UGGUAGAAUUGUUGAGAU   | 19        | 61 | -0.6               | 0                   | -27.4               | GCACGUGGUAGAAUUGUUGAGAUUCGUGC  |
| 32   | 403   | 47  | 0.698    | GUGUUGCUGUUGCUGUUGU  | 19        | 70 | -4.1               | -1.1                | -32.7               | CGCGAGUGUUGCUGUUGCUGUUGUUCGCG  |
| 33   | 399   | 47  | 0.698    | UGCUGUUGCUGUUGUAGGU  | 19        | 71 | -4.7               | -1.1                | -33.7               | GCACGUGCUGUUGCUGUUGUAGGUCGUGC  |
| 34   | 400   | 47  | 0.698    | UUGCUGUUGCUGUUGUAGG  | 19        | 70 | -5.9               | -1.1                | -32.9               | GCACGUUGCUGUUGCUGUUGUAGGCGUGC  |
| 35   | 1220  | 47  | 0.696    | GUUGUAGGUUCCACUGGUU  | 19        | 70 | -6.4               | -0.5                | -33.2               | CGCGAGUUGUAGGUUCCACUGGUUUCGCG  |
| 36   | 1219  | 42  | 0.696    | UUGUAGGUUCCACUGGUUA  | 19        | 68 | -6.4               | -0.5                | -31.8               | GCCGUUGUAGGUUCCACUGGUUACGGC    |
| 37   | 1218  | 42  | 0.694    | UGUAGGUUCCACUGGUUAA  | 19        | 68 | -6.4               | -0.5                | -31.8               | GCCGUGUAGGUUCCACUGGUUACGGC     |
| 38   | 402   | 42  | 0.694    | UGUUGCUGUUGCUGUUGUA  | 19        | 68 | -4.1               | -1.1                | -31.3               | GCCGUGUUGCUGUUGCUGUUGUACGGC    |
| 39   | 1241  | 42  | 0.693    | GUUAAUCGUCAGCAGAGAA  | 19        | 65 | -4.3               | 0                   | -30.8               | GCACGGUAAUCGUCAGCAGAGAACGUGC   |
| 40   | 1685  | 42  | 0.693    | GUUGAUUAGACAGGAGUGU  | 19        | 66 | -6.2               | -0.4                | -31.5               | CGCGAGUUGAUUAGACAGGAGUGUUCGCG  |
| 41   | 1221  | 52  | 0.693    | CGUUGUAGGUUCCACUGGU  | 19        | 72 | -6.4               | -0.5                | -34.7               | GCACGCGUUGUAGGUUCCACUGGUCGUGC  |
| 42   | 1236  | 47  | 0.691    | UCGUCAGCAGAGAAUCGUU  | 19        | 69 | -4.3               | 0                   | -32.9               | GCACGUCGUCAGCAGAGAAUCGUUCGUGC  |
| 43   | 401   | 47  | 0.691    | GUUGCUGUUGCUGUUGUAG  | 19        | 68 | -5.1               | -1.1                | -32.3               | GCACGGUUGCUGUUGCUGUUGUAGCGUGC  |
| 44   | 1684  | 36  | 0.689    | UUGAUUAGACAGGAGUGUA  | 19        | 64 | -6.2               | -0.4                | -30.1               | GCCGUUGAUUAGACAGGAGUGUACGGC    |
| 45   | 1235  | 52  | 0.689    | CGUCAGCAGAGAAUCGUUG  | 19        | 69 | -7.1               | -1.3                | -33.6               | CGAGCGUCAGCAGAGAAUCGUUGCUCG    |
| 46   | 1237  | 47  | 0.688    | AUCGUCAGCAGAGAAUCGU  | 19        | 69 | -4.3               | 0                   | -33.1               | CGCCAUCGUCAGCAGAGAAUCGUGGCG    |
| 47   | 1240  | 36  | 0.688    | UUAUCGUCAGCAGAGAAU   | 19        | 64 | -4.3               | 0                   | -29.2               | GCACGUUAAUCGUCAGCAGAGAAUCGUGC  |
| 48   | 1222  | 52  | 0.688    | UCGUUGUAGGUUCCACUGG  | 19        | 72 | -6.4               | -0.5                | -34.9               | CGCGAUCGUUGUAGGUUCCACUGGUCGCG  |
| 49   | 1238  | 47  | 0.686    | AAUCGUCAGCAGAGAAUCG  | 19        | 67 | -4.3               | 0                   | -32.3               | GCACGAAUCGUCAGCAGAGAAUCGCGUGC  |
| 50   | 971   | 36  | 0.686    | CUGGUAGAAUUGUUGAGA   | 19        | 63 | -5                 | 0                   | -28.9               | GCACGCUUGUAGAAUUGUUGAGACGUGC   |
| 1    | 80    | 40  | 0.808    | GAUAAUAGGUUUUGGCGGAA | 20        | 67 | -5.9               | 0                   | -31.6               | CGACGGAUAAUAGGUUUUGGCGGAACGUGC |

| Rank | Base# | %GC | ss-count | Probe sequence       | probe len | Tm | $\Delta G_{\text{bimol}}$ | $\Delta G_{\text{unimol}}$ | $\Delta G_{\text{duplex}}$ | Molecular beacon sequence       |
|------|-------|-----|----------|----------------------|-----------|----|---------------------------|----------------------------|----------------------------|---------------------------------|
| 2    | 2822  | 35  | 0.805    | UUGGAUUUUACAUUGCAGCU | 20        | 66 | -5.1                      | 0                          | -30.2                      | GCACGUUGGAUUUUACAUUGCAGCUCGUGC  |
| 3    | 81    | 40  | 0.803    | AGAUAUUAGGUUUUGGCGGA | 20        | 69 | -4.1                      | 0                          | -32.3                      | CGACGAGAUAAUAGGUUUUGGCGGACGUCG  |
| 4    | 82    | 40  | 0.798    | AAGAUAAUAGGUUUUGGCGG | 20        | 67 | -3.4                      | 0                          | -31.3                      | CGACGAAGAUAAUAGGUUUUGGCGGCGUCG  |
| 5    | 2227  | 40  | 0.798    | UUUUGGGAAAAGCGGAAAAG | 20        | 66 | -3.8                      | -0.6                       | -30.3                      | CGCGAUUUUGGGAAAAGCGGAAAAGUCGCG  |
| 6    | 2226  | 40  | 0.797    | UUUGGGAAAAGCGGAAAAGU | 20        | 68 | -2.7                      | 0                          | -31.1                      | CGACGUUUGGGAAAAGCGGAAAAGUCGUCG  |
| 7    | 83    | 35  | 0.795    | UAAGAUAAUAGGUUUUGGCG | 20        | 64 | -4.6                      | -0.4                       | -29.3                      | CGCGAUAAAGAUAAUAGGUUUUGGCGUCGCG |
| 8    | 2225  | 40  | 0.790    | UUGGGAAAAGCGGAAAAGUU | 20        | 68 | -2.7                      | 0                          | -31.1                      | CGAGCUUGGGAAAAGCGGAAAAGUUCGUCG  |
| 9    | 2224  | 40  | 0.779    | UGGGAAAAGCGGAAAAGUUU | 20        | 68 | -2.8                      | -0.7                       | -31.1                      | CGACGUGGGAAAAGCGGAAAAGUUUCGUCG  |
| 10   | 2811  | 40  | 0.769    | AUUGCAGCUUGUUUAGGAC  | 20        | 68 | -7                        | 0                          | -32.4                      | GCACGAUUGCAGCUUGUUUAGGACCGUGC   |
| 11   | 2821  | 35  | 0.763    | UGGAUUUUACAUUGCAGCUU | 20        | 66 | -5.1                      | 0                          | -30.2                      | GCACGUGGAUUUUACAUUGCAGCUUCGUGC  |
| 12   | 2823  | 35  | 0.761    | UUUGGAUUUUACAUUGCAGC | 20        | 64 | -5.1                      | 0                          | -29.5                      | GCACGUUUGGAUUUUACAUUGCAGCCGUGC  |
| 13   | 2223  | 45  | 0.747    | GGGAAAAGCGGAAAAGUUUG | 20        | 68 | -4.4                      | -1.5                       | -32.1                      | CGACGGGAAAAGCGGAAAAGUUUGCGUCG   |
| 14   | 2812  | 40  | 0.726    | CAUUGCAGCUUGUUUAGGA  | 20        | 67 | -7                        | 0                          | -32.3                      | GCACGCAUUGCAGCUUGUUUAGGACGUGC   |
| 15   | 70    | 50  | 0.724    | UUUGGCGGAAGUAUUGGUGC | 20        | 73 | -7.1                      | -0.2                       | -35.7                      | CGACGUUUGGCGGAAGUAUUGGUGCCGUCG  |
| 16   | 2820  | 40  | 0.723    | GGAUUUUACAUUGCAGCUUG | 20        | 66 | -4.9                      | 0                          | -31.2                      | GCACGGGAUUUUACAUUGCAGCUUCGUGC   |
| 17   | 2214  | 35  | 0.721    | GGAAAAGUUUGAAGAGAAGU | 20        | 63 | -1.4                      | 0                          | -29.5                      | CGCGAGGAAAAGUUUGAAGAGAAGUUCGCG  |
| 18   | 2215  | 40  | 0.716    | CGGAAAAGUUUGAAGAGAAG | 20        | 63 | -2.4                      | 0                          | -30.2                      | CGAGCGGAAAAGUUUGAAGAGAAGCUCG    |
| 19   | 2222  | 40  | 0.715    | GGAAAAGCGGAAAAGUUUGA | 20        | 66 | -4.4                      | -1.5                       | -30.7                      | CGACGGGAAAAGCGGAAAAGUUUGACGUCG  |
| 20   | 399   | 45  | 0.713    | UUGCUGUUGCUGUUGUAGGU | 20        | 71 | -5.9                      | -1.1                       | -34.6                      | GCACGUUGCUGUUGCUGUUGUAGGUCGUGC  |
| 21   | 1219  | 45  | 0.710    | GUUGUAGGUUCCACUGGUUA | 20        | 70 | -6.4                      | -0.5                       | -34.5                      | GCACGGUUGUAGGUUCCACUGGUUACGUGC  |
| 22   | 404   | 50  | 0.710    | UGGUGUUGCUGUUGCUGUUG | 20        | 72 | -4.1                      | -1.1                       | -35.9                      | CGAGCUGGUGUUGCUGUUGCUGUUGGCUCG  |
| 23   | 1218  | 40  | 0.708    | UUGUAGGUUCCACUGGUUAA | 20        | 68 | -6.4                      | -0.5                       | -32.7                      | CCGUUGUAGGUUCCACUGGUUACGG       |
| 24   | 1220  | 50  | 0.706    | CGUUGUAGGUUCCACUGGUU | 20        | 72 | -6.4                      | -0.5                       | -35.6                      | GCACGCGUUGUAGGUUCCACUGGUUCGUGC  |
| 25   | 403   | 50  | 0.706    | GGUGUUGCUGUUGCUGUUGU | 20        | 72 | -4.1                      | -1.1                       | -36                        | CGCGAGGUGUUGCUGUUGCUGUUGUUCGCG  |
| 26   | 400   | 50  | 0.706    | GUUGCUGUUGCUGUUGUAGG | 20        | 71 | -5.9                      | -1.1                       | -35.6                      | GCACGGUUGCUGUUGCUGUUGUAGGCGUGC  |
| 27   | 402   | 45  | 0.703    | GUGUUGCUGUUGCUGUUGUA | 20        | 69 | -4.1                      | -1.1                       | -34                        | CGAGCGUGUUGCUGUUGCUGUUGUAGCUCG  |
| 28   | 1236  | 45  | 0.702    | AUCGUCAGCAGAGAAUCGUU | 20        | 69 | -4.3                      | 0                          | -34                        | CGCCAUCGUCAGCAGAGAAUCGUUGGCG    |
| 29   | 1240  | 40  | 0.702    | GUUAAUCGUCAGCAGAGAAU | 20        | 66 | -4.3                      | 0                          | -31.9                      | CGCGAGUAAUCGUCAGCAGAGAAUCGCG    |
| 30   | 1684  | 40  | 0.702    | GUUGAUUAGACAGGAGUGUA | 20        | 66 | -6.2                      | -0.4                       | -32.8                      | CGAGCGUUGAUUAGACAGGAGUGUAGCUCG  |
| 31   | 1221  | 50  | 0.702    | UCGUUGUAGGUUCCACUGGU | 20        | 73 | -6.4                      | -0.5                       | -36.6                      | GCACGUCGUUGUAGGUUCCACUGGUCGUGC  |
| 32   | 1235  | 50  | 0.702    | UCGUCAGCAGAGAAUCGUUG | 20        | 70 | -7.1                      | -1.3                       | -35.5                      | CGCGAUCGUCAGCAGAGAAUCGUUGUCGCG  |
| 33   | 1237  | 45  | 0.700    | AAUCGUCAGCAGAGAAUCGU | 20        | 69 | -4.3                      | 0                          | -34                        | CGCCAAUCGUCAGCAGAGAAUCGUGGCG    |
| 34   | 401   | 45  | 0.700    | UGUUGCUGUUGCUGUUGUAG | 20        | 69 | -5.1                      | -1.1                       | -33.9                      | GCACGUGUUGCUGUUGCUGUUGUAGCGUGC  |
| 35   | 1238  | 45  | 0.698    | UAAUCGUCAGCAGAGAAUCG | 20        | 67 | -4.3                      | 0                          | -33.6                      | CGCGAUAAUCGUCAGCAGAGAAUCGUCGCG  |
| 36   | 1239  | 40  | 0.698    | UUAAUCGUCAGCAGAGAAUC | 20        | 65 | -4.3                      | 0                          | -32.1                      | GCACGUUAAUCGUCAGCAGAGAAUCCGUGC  |
| 37   | 1683  | 35  | 0.698    | UUGAUUAGACAGGAGUGUAU | 20        | 65 | -6.2                      | -0.4                       | -31.2                      | CGAGCUUGAUUAGACAGGAGUGUAUGCUCG  |
| 38   | 1222  | 50  | 0.697    | AUCGUUGUAGGUUCCACUGG | 20        | 72 | -6.4                      | -0.5                       | -36                        | GCACGAUCGUUGUAGGUUCCACUGGCGUGC  |
| 39   | 1223  | 45  | 0.695    | AAUCGUUGUAGGUUCCACUG | 20        | 69 | -6.4                      | -0.3                       | -33.6                      | GCACGAAUCGUUGUAGGUUCCACUGCGUGC  |
| 40   | 1217  | 40  | 0.690    | UGUAGGUUCCACUGGUUAAA | 20        | 68 | -6.4                      | -0.5                       | -32.7                      | GCCGUGUAGGUUCCACUGGUUAAACGGC    |
| 41   | 2819  | 35  | 0.682    | GAUUUUACAUUGCAGCUUGU | 20        | 64 | -5.4                      | 0                          | -29.6                      | CGCGAGAUUUUACAUUGCAGCUUGUUCGCG  |
| 42   | 858   | 40  | 0.682    | UUUUCAUCCGUUAUCUUGGG | 20        | 66 | -5.4                      | -1.8                       | -31.4                      | CGCGAUUUUCAUCCGUUAUCUUGGGUCGCG  |
| 43   | 2813  | 40  | 0.681    | ACAUUGCAGCUUGUUUAGG  | 20        | 68 | -5.9                      | 0                          | -32.1                      | GCACGACAUUGCAGCUUGUUUAGGCGUGC   |
| 44   | 2814  | 35  | 0.681    | UACAUUGCAGCUUGUUUAG  | 20        | 64 | -6                        | 0                          | -30.1                      | GCACGUACAUUGCAGCUUGUUUAGCGUGC   |



| Rank | Base# | %GC | ss-count | Probe sequence        | probe len | Tm | $\Delta G_{bimol}$ | $\Delta G_{unimol}$ | $\Delta G_{duplex}$ | Molecular beacon sequence        |
|------|-------|-----|----------|-----------------------|-----------|----|--------------------|---------------------|---------------------|----------------------------------|
| 45   | 857   | 45  | 0.679    | UUUCAUCCGUUAUCUUGGGC  | 20        | 69 | -6.5               | -1.9                | -33.9               | CGACGUUUCAUCCGUUAUCUUGGGCCGUCG   |
| 46   | 2221  | 35  | 0.677    | GAAAAGCGGAAAAGUUUGAA  | 20        | 63 | -4.4               | -1.5                | -28.3               | CGACGGAAAAGCGGAAAAGUUUGAACGUCG   |
| 47   | 90    | 35  | 0.676    | ACGGACUUAAGAUAAUAGGU  | 20        | 66 | -7.1               | -1                  | -30.4               | CCGACGGACUUAAGAUAAUAGGUCGG       |
| 48   | 970   | 35  | 0.674    | CUGGUAGAAUUGUUGAGAU   | 20        | 63 | -5                 | 0                   | -30                 | GCACGCUGGUAGAAUUGUUGAGAUUCGUGC   |
| 49   | 1216  | 40  | 0.673    | GUAGGUUCCACUGGUUAAAA  | 20        | 67 | -6.4               | -0.5                | -32                 | GCACGGUAGGUUCCACUGGUUAAAACGUGC   |
| 50   | 859   | 40  | 0.669    | CUUUUCAUCCGUUAUCUUGG  | 20        | 64 | -2.6               | -0.4                | -30.7               | CGAGCUUUUCAUCCGUUAUCUUGGCUCG     |
| 1    | 2226  | 38  | 0.806    | UUUUGGGAAAAGCGGAAAAGU | 21        | 68 | -3.8               | -0.6                | -32                 | CGACGUUUUGGGAAAAGCGGAAAAGUCGUCG  |
| 2    | 80    | 38  | 0.802    | AGAUAAUAGGUUUUGGCGGAA | 21        | 69 | -5.9               | 0                   | -33.2               | CGACGAGAUAAUAGGUUUUGGCGGAACGUCG  |
| 3    | 2225  | 38  | 0.800    | UUUGGGAAAAGCGGAAAAGUU | 21        | 68 | -2.7               | 0                   | -32                 | CGACGUUUUGGGAAAAGCGGAAAAGUUCGUCG |
| 4    | 81    | 38  | 0.796    | AAGAUAAUAGGUUUUGGCGGA | 21        | 69 | -4.1               | 0                   | -33.2               | CGACGAAGAUAAUAGGUUUUGGCGGACGUCG  |
| 5    | 82    | 38  | 0.793    | UAAGAUAAUAGGUUUUGGCGG | 21        | 67 | -4.6               | -0.4                | -32.6               | CGCGAUAAAGAUAAUAGGUUUUGGCGGUCGCG |
| 6    | 83    | 33  | 0.793    | UUAAGAUAAUAGGUUUUGGCG | 21        | 64 | -5                 | -0.6                | -30.2               | CGCGAUAAAGAUAAUAGGUUUUGGCGUCGCG  |
| 7    | 2224  | 38  | 0.790    | UUGGGAAAAGCGGAAAAGUUU | 21        | 68 | -2.8               | -0.7                | -32                 | CGACGUUGGGAAAAGCGGAAAAGUUUCGUCG  |
| 8    | 84    | 33  | 0.783    | CUUAAGAUAAUAGGUUUUGGC | 21        | 64 | -5.4               | -0.8                | -30.4               | CGACGCUUAAGAUAAUAGGUUUUGGCCGUCG  |
| 9    | 2822  | 33  | 0.771    | UUUGGAUUUUACAUUGCAGCU | 21        | 66 | -5.1               | 0                   | -31.1               | GCACGUUUGGAUUUUACAUUGCAGCUCGUGC  |
| 10   | 2821  | 33  | 0.770    | UUGGAUUUUACAUUGCAGCUU | 21        | 66 | -5.1               | 0                   | -31.1               | GCACGUUGGAUUUUACAUUGCAGCUUCGUGC  |
| 11   | 2223  | 42  | 0.753    | UGGGAAAAGCGGAAAAGUUUG | 21        | 69 | -4.4               | -1.5                | -33.7               | CGCGAUGGGAAAAGCGGAAAAGUUUGUCGCG  |
| 12   | 2811  | 42  | 0.733    | CAUUGCAGCUUGUUUAGGAC  | 21        | 69 | -7                 | 0                   | -35                 | GCACGCAUUGCAGCUUGUUUAGGACCGUGC   |
| 13   | 2820  | 38  | 0.730    | UGGAUUUUACAUUGCAGCUUG | 21        | 67 | -5.1               | 0                   | -32.8               | GCACGUGGAUUUUACAUUGCAGCUUGCGUGC  |
| 14   | 2823  | 33  | 0.730    | UUUUGGAUUUUACAUUGCAGC | 21        | 64 | -5.1               | 0                   | -30.4               | GCACGUUUUGGAUUUUACAUUGCAGCCGUGC  |
| 15   | 2222  | 42  | 0.722    | GGGAAAAGCGGAAAAGUUUGA | 21        | 69 | -4.4               | -1.5                | -34                 | CGACGGGAAAAGCGGAAAAGUUUGACGUCG   |
| 16   | 1218  | 42  | 0.720    | GUUGUAGGUUCCACUGGUUAA | 21        | 70 | -6.4               | -0.5                | -35.4               | GCACGGUUGUAGGUUCCACUGGUUAAACGUGC |
| 17   | 399   | 47  | 0.720    | GUUGCUGUUGCUGUUGUAGGU | 21        | 73 | -5.9               | -1.1                | -37.3               | CGCGAGUUGCUGUUGCUGUUGUAGGUUCGCG  |
| 18   | 1219  | 47  | 0.719    | CGUUGUAGGUUCCACUGGUUA | 21        | 72 | -6.4               | -0.5                | -36.9               | GCACGCGUUGUAGGUUCCACUGGUUACGUGC  |
| 19   | 1220  | 47  | 0.714    | UCGUUGUAGGUUCCACUGGUU | 21        | 73 | -6.4               | -0.5                | -37.5               | GCACGUCGUUGUAGGUUCCACUGGUUCGUGC  |
| 20   | 403   | 47  | 0.714    | UGGUGUUGCUGUUGCUGUUGU | 21        | 73 | -4.1               | -1.1                | -37.6               | CGAGCUGGUGUUGCUGUUGCUGUUGUGCUCG  |
| 21   | 400   | 47  | 0.714    | UGUUGCUGUUGCUGUUGUAGG | 21        | 72 | -5.9               | -1.1                | -37.2               | GCACGUGUUGCUGUUGCUGUUGUAGGCGUGC  |
| 22   | 1236  | 42  | 0.713    | AAUCGUCAGCAGAGAAUCGUU | 21        | 69 | -4.3               | 0                   | -34.9               | CCGAAUCGUCAGCAGAGAAUCGUUCGG      |
| 23   | 1237  | 42  | 0.711    | UAAUCGUCAGCAGAGAAUCGU | 21        | 69 | -4.3               | 0                   | -35.3               | GCACGUAAUCGUCAGCAGAGAAUCGUCGUGC  |
| 24   | 1239  | 42  | 0.711    | GUUAAUCGUCAGCAGAGAAUC | 21        | 67 | -4.3               | 0                   | -34.8               | CGAGGUUAAUCGUCAGCAGAGAAUCCUCG    |
| 25   | 1238  | 42  | 0.711    | UUAUCGUCAGCAGAGAAUCG  | 21        | 67 | -4.3               | 0                   | -34.5               | CGCGAUUAAUCGUCAGCAGAGAAUCGUCGCG  |
| 26   | 402   | 47  | 0.711    | GGUGUUGCUGUUGCUGUUGUA | 21        | 72 | -4.4               | -1.1                | -37.3               | CGAGCGGUGUUGCUGUUGCUGUUGUAGCUCG  |
| 27   | 1235  | 47  | 0.711    | AUCGUCAGCAGAGAAUCGUUG | 21        | 70 | -7.1               | -1.3                | -36.6               | GCACGAUCGUCAGCAGAGAAUCGUUGCGUGC  |
| 28   | 1683  | 38  | 0.710    | GUUGAUUAGACAGGAGUGUAU | 21        | 67 | -6.2               | -0.4                | -33.9               | CGCGAGUUGAUUAGACAGGAGUGUAUUCGCG  |
| 29   | 401   | 47  | 0.708    | GUGUUGCUGUUGCUGUUGUAG | 21        | 71 | -5.1               | -1.1                | -36.6               | CGAGCGUGUUGCUGUUGCUGUUGUAGGCUCG  |
| 30   | 1217  | 38  | 0.704    | UUGUAGGUUCCACUGGUUAAA | 21        | 68 | -6.4               | -0.5                | -33.6               | CCGUUGUAGGUUCCACUGGUUAAAACGG     |
| 31   | 2818  | 33  | 0.697    | GAUUUUACAUUGCAGCUUGUU | 21        | 64 | -6                 | 0                   | -30.5               | CGCGAGAUUUUACAUUGCAGCUUGUUUCGCG  |
| 32   | 2813  | 38  | 0.696    | UACAUUGCAGCUUGUUUAGG  | 21        | 68 | -6                 | 0                   | -33.4               | GCACGUACAUUGCAGCUUGUUUAGGCGUGC   |
| 33   | 2814  | 33  | 0.696    | UUACAUUGCAGCUUGUUUAG  | 21        | 65 | -6                 | 0                   | -31                 | GCACGUUACAUUGCAGCUUGUUUAGCGUGC   |
| 34   | 2213  | 33  | 0.693    | GGAAAAGUUUGAAGAGAAGUU | 21        | 63 | -1.4               | 0                   | -30.4               | CGCGAGGAAAAGUUUGAAGAGAAGUUUCGCG  |
| 35   | 2812  | 38  | 0.693    | ACAUUGCAGCUUGUUUAGGA  | 21        | 69 | -7                 | 0                   | -34                 | GCACGACAUUGCAGCUUGUUUAGGACGUGC   |
| 36   | 2819  | 38  | 0.691    | GGAUUUUACAUUGCAGCUUGU | 21        | 67 | -5.4               | 0                   | -32.9               | CGCGAGGAUUUUACAUUGCAGCUUGUUCGCG  |
| 37   | 2221  | 38  | 0.691    | GGAAAAGCGGAAAAGUUUGAA | 21        | 66 | -4.4               | -1.5                | -31.6               | CGACGGGAAAAGCGGAAAAGUUUGAACGUCG  |

| Rank | Base# | %GC | ss-count | Probe sequence         | probe len | Tm | $\Delta G_{bimol}$ | $\Delta G_{unimol}$ | $\Delta G_{duplex}$ | Molecular beacon sequence         |
|------|-------|-----|----------|------------------------|-----------|----|--------------------|---------------------|---------------------|-----------------------------------|
| 38   | 2214  | 38  | 0.688    | CGGAAAAGUUUGAAGAGAAGU  | 21        | 65 | -2.4               | 0                   | -31.9               | CGACGCGGAAAAGUUUGAAGAGAAGUCGUCG   |
| 39   | 1216  | 38  | 0.687    | UGUAGGUUCCACUGGUUAAAA  | 21        | 68 | -6.4               | -0.5                | -33.6               | GCCGUGUAGGUUCCACUGGUUAAAACGGC     |
| 40   | 857   | 42  | 0.687    | UUUUCAUCCGUUAUCUUGGGC  | 21        | 69 | -6.5               | -1.9                | -34.8               | CGACGUUUUCAUCCGUUAUCUUGGGCCGUCG   |
| 41   | 2215  | 42  | 0.684    | GCGGAAAAGUUUGAAGAGAAG  | 21        | 67 | -2.8               | 0                   | -33.6               | CGACGCGGAAAAGUUUGAAGAGAAGCGUCG    |
| 42   | 2220  | 38  | 0.680    | GAAAAGCGGAAAAGUUUGAAG  | 21        | 64 | -4.4               | -1.5                | -30.9               | CGACGAAAAGCGGAAAAGUUUGAAGCGUCG    |
| 43   | 398   | 47  | 0.679    | UUGCUGUUGCUGUUGUAGGUG  | 21        | 72 | -5.9               | -1.1                | -37.2               | GCACGUUGCUGUUGCUGUUGUAGGUGCGUGC   |
| 44   | 404   | 52  | 0.676    | CUGGUGUUGCUGUUGCUGUUG  | 21        | 73 | -4.1               | -1.1                | -38.5               | CGAGCUGGUGUUGCUGUUGCUGUUGCUCG     |
| 45   | 2216  | 38  | 0.674    | AGCGAAAAGUUUGAAGAGAA   | 21        | 67 | -2.8               | 0                   | -32.6               | CGACGAGCGGAAAAGUUUGAAGAGAACGUCG   |
| 46   | 858   | 42  | 0.674    | CUUUUCAUCCGUUAUCUUGGG  | 21        | 67 | -5.4               | -1.8                | -34                 | CGAGCUUUUCAUCCGUUAUCUUGGGCUCG     |
| 47   | 856   | 42  | 0.674    | UUUCAUCCGUUAUCUUGGGCA  | 21        | 70 | -6.5               | -1.9                | -35.5               | GCCGUUUUCAUCCGUUAUCUUGGGCACGGC    |
| 48   | 1240  | 38  | 0.671    | AGUUAUCGUCAGCAGAGAAU   | 21        | 67 | -4.3               | 0                   | -33.5               | CGCCAGUUAUCGUCAGCAGAGAAUGGCG      |
| 49   | 1684  | 42  | 0.670    | CGUUGAUUAGACAGGAGUGUA  | 21        | 68 | -6.2               | -0.4                | -35.2               | CGAGCCGUUGAUUAGACAGGAGUGUAGCUCG   |
| 50   | 1215  | 38  | 0.670    | GUAGGUUCCACUGGUUAAAAU  | 21        | 68 | -6.4               | -0.5                | -33.1               | CGCGAGUAGGUUCCACUGGUUAAAAUUCGCG   |
| 1    | 2225  | 36  | 0.809    | UUUUGGGAAAAGCGGAAAAGUU | 22        | 68 | -3.8               | -0.6                | -32.9               | CGACGUUUUGGGAAAAGCGGAAAAGUUCGUCG  |
| 2    | 2224  | 36  | 0.799    | UUUGGGAAAAGCGGAAAAGUUU | 22        | 68 | -2.8               | -0.7                | -32.9               | CGACGUUUUGGGAAAAGCGGAAAAGUUUCGUCG |
| 3    | 80    | 36  | 0.795    | AAGAUAAUAGGUUUUGGCGGAA | 22        | 69 | -5.9               | 0                   | -34.1               | CGACGAAGAUAAUAGGUUUUGGCGAACGUCG   |
| 4    | 81    | 36  | 0.790    | UAAGAUAAUAGGUUUUGGCGGA | 22        | 69 | -4.6               | -0.4                | -34.5               | CCGUAAGAUAAUAGGUUUUGGCGGACCGG     |
| 5    | 82    | 36  | 0.790    | UUAAGAUAAUAGGUUUUGGCGG | 22        | 68 | -5                 | -0.6                | -33.5               | CGCGAUUAAAGAUAAUAGGUUUUGGCGGUCGCG |
| 6    | 83    | 36  | 0.777    | CUUAAGAUAAUAGGUUUUGGCG | 22        | 66 | -5.4               | -0.8                | -32.8               | CGAGCUUAAGAUAAUAGGUUUUGGCGCUCG    |
| 7    | 84    | 31  | 0.770    | ACUUAAGAUAAUAGGUUUUGGC | 22        | 65 | -5.4               | -0.8                | -32.1               | CGACGACUUAAGAUAAUAGGUUUUGGCCGUCG  |
| 8    | 2223  | 40  | 0.764    | UUGGGAAAAGCGGAAAAGUUUG | 22        | 69 | -4.4               | -1.5                | -34.6               | CGCGAUUGGGAAAAGCGGAAAAGUUUGUCGCG  |
| 9    | 2822  | 31  | 0.740    | UUUUGGAUUUUACAUUGCAGCU | 22        | 66 | -5.1               | 0                   | -32                 | GCACGUUUUGGAUUUUACAUUGCAGCUCGUGC  |
| 10   | 2821  | 31  | 0.739    | UUUGGAUUUUACAUUGCAGCUU | 22        | 66 | -5.1               | 0                   | -32                 | GCACGUUUUGGAUUUUACAUUGCAGCUUCGUGC |
| 11   | 2820  | 36  | 0.738    | UUGGAUUUUACAUUGCAGCUUG | 22        | 67 | -5.1               | 0                   | -33.7               | GCACGUUGGAUUUUACAUUGCAGCUUGCUGUC  |
| 12   | 1218  | 45  | 0.729    | CGUUGUAGGUUCCACUGGUUAA | 22        | 72 | -6.4               | -0.5                | -37.8               | GCACGCGUUGUAGGUUCCACUGGUUAAACGUGC |
| 13   | 2222  | 40  | 0.729    | UGGGAAAAGCGGAAAAGUUUGA | 22        | 70 | -4.4               | -1.5                | -35.6               | CCGUGGGAAAAGCGGAAAAGUUUGACCGG     |
| 14   | 399   | 45  | 0.727    | UGUUGCUGUUGCUGUUGUAGGU | 22        | 73 | -5.9               | -1.1                | -38.9               | GCACGUGUUGCUGUUGCUGUUGUAGGUCGUGC  |
| 15   | 1219  | 45  | 0.726    | UCGUUGUAGGUUCCACUGGUUA | 22        | 73 | -6.4               | -0.5                | -38.8               | GCCGUCGUUGUAGGUUCCACUGGUUACGGC    |
| 16   | 1238  | 45  | 0.723    | GUUAAUCGUCAGCAGAGAAUCG | 22        | 69 | -4.3               | 0                   | -37.2               | GCACGGUUAUCGUCAGCAGAGAAUCGCGUGC   |
| 17   | 1237  | 40  | 0.723    | UUAUCGUCAGCAGAGAAUCGU  | 22        | 69 | -4.3               | 0                   | -36.2               | GCACGUUAAUCGUCAGCAGAGAAUCGUCGUGC  |
| 18   | 1236  | 40  | 0.723    | UAAUCGUCAGCAGAGAAUCGUU | 22        | 69 | -4.3               | 0                   | -36.2               | GCACGUAAUCGUCAGCAGAGAAUCGUUCGUGC  |
| 19   | 400   | 50  | 0.721    | GUGUUGCUGUUGCUGUUGUAGG | 22        | 73 | -5.9               | -1.1                | -39.9               | CGAGCGUGUUGCUGUUGCUGUUGUAGGGCUCG  |
| 20   | 1235  | 45  | 0.721    | AAUCGUCAGCAGAGAAUCGUUG | 22        | 70 | -7.1               | -1.3                | -37.5               | GCACGAAUCGUCAGCAGAGAAUCGUUGCGUGC  |
| 21   | 402   | 45  | 0.718    | UGGUGUUGCUGUUGCUGUUGUA | 22        | 73 | -4.6               | -1.1                | -38.9               | GCCGUGGUGUUGCUGUUGCUGUUGUACGGC    |
| 22   | 1217  | 40  | 0.716    | GUUGUAGGUUCCACUGGUUAAA | 22        | 70 | -6.4               | -0.5                | -36.3               | GCACGGUUGUAGGUUCCACUGGUUAAACGUGC  |
| 23   | 401   | 50  | 0.716    | GGUGUUGCUGUUGCUGUUGUAG | 22        | 73 | -5.7               | -1.1                | -39.9               | CGAGCGGUGUUGCUGUUGCUGUUGUAGGCUCG  |
| 24   | 2817  | 31  | 0.711    | GAUUUUACAUUGCAGCUUGUUA | 22        | 64 | -6                 | 0                   | -31.8               | GCACGGAUUUUACAUUGCAGCUUGUUAACGUGC |
| 25   | 2813  | 36  | 0.710    | UUACAUUGCAGCUUGUUAUAGG | 22        | 68 | -6                 | 0                   | -34.3               | GCACGUUACAUUGCAGCUUGUUAUAGGCGUGC  |
| 26   | 2814  | 31  | 0.710    | UUUACAUUGCAGCUUGUUAUAG | 22        | 65 | -6                 | 0                   | -31.9               | GCACGUUUACAUUGCAGCUUGUUAUAGCGUGC  |
| 27   | 2812  | 36  | 0.707    | UACAUUGCAGCUUGUUAUAGGA | 22        | 69 | -7                 | 0                   | -35.3               | GCCGUACAUUGCAGCUUGUUAUAGGACGGC    |
| 28   | 2818  | 36  | 0.705    | GGAUUUUACAUUGCAGCUUGUU | 22        | 67 | -6                 | 0                   | -33.8               | CGCGAGGAUUUUACAUUGCAGCUUGUUUCGCG  |
| 29   | 2823  | 31  | 0.701    | UUUUUGGAUUUUACAUUGCAGC | 22        | 65 | -5.1               | 0                   | -31.3               | GCACGUUUUUGGAUUUUACAUUGCAGCCGUGC  |
| 30   | 2811  | 40  | 0.701    | ACAUUGCAGCUUGUUAUAGGAC | 22        | 70 | -7                 | 0                   | -36.7               | GCACGACAUUGCAGCUUGUUAUAGGACCGUGC  |

| Rank | Base# | %GC | ss-count | Probe sequence          | probe len | Tm | $\Delta G_{bimol}$ | $\Delta G_{unimol}$ | $\Delta G_{duplex}$ | Molecular beacon sequence          |
|------|-------|-----|----------|-------------------------|-----------|----|--------------------|---------------------|---------------------|------------------------------------|
| 31   | 2819  | 36  | 0.699    | UGGAUUUUACAUUGCAGCUUGU  | 22        | 68 | -5.4               | 0                   | -34.5               | GCACGUGGAUUUUACAUUGCAGCUUGUCGUGC   |
| 32   | 1216  | 36  | 0.699    | UUGUAGGUUCCACUGGUUAAAA  | 22        | 68 | -6.4               | -0.5                | -34.5               | CCGUUGUAGGUUCCACUGGUUAAAACGG       |
| 33   | 2221  | 40  | 0.699    | GGAAAAGCGGAAAAGUUUGAA   | 22        | 69 | -4.4               | -1.5                | -34.9               | CGACGGGAAAAGCGGAAAAGUUUGAACGUCG    |
| 34   | 2220  | 40  | 0.694    | GGAAAAGCGGAAAAGUUUGAAG  | 22        | 68 | -4.4               | -1.5                | -34.2               | CGACGGGAAAAGCGGAAAAGUUUGAAGCGUCG   |
| 35   | 2215  | 40  | 0.689    | AGCGGAAAAGUUUGAAGAGAAG  | 22        | 68 | -2.8               | 0                   | -35.2               | CGACGAGCGGAAAAGUUUGAAGAGAAGCGUCG   |
| 36   | 398   | 50  | 0.688    | GUUGCUGUUGCUGUUGUAGGUG  | 22        | 73 | -5.9               | -1.1                | -39.9               | GCACGGUUGCUGUUGCUGUUGUAGGUGCGUGC   |
| 37   | 1215  | 36  | 0.683    | UGUAGGUUCCACUGGUUAAAAU  | 22        | 69 | -6.4               | -0.5                | -34.7               | GCACGUGUAGGUUCCACUGGUUAAAAUCGUGC   |
| 38   | 1239  | 40  | 0.682    | AGUUAUCGUCAGCAGAGAAUC   | 22        | 68 | -4.3               | 0                   | -36.4               | GCACGAGUUAUCGUCAGCAGAGAAUCCGUGC    |
| 39   | 2216  | 36  | 0.682    | AAGCGGAAAAGUUUGAAGAGAA  | 22        | 67 | -3.6               | -1.1                | -33.5               | CGACGAAGCGGAAAAGUUUGAAGAGAACGUCG   |
| 40   | 403   | 50  | 0.682    | CUGGUGUUGCUGUUGCUGUUGU  | 22        | 74 | -4.1               | -1.1                | -40.2               | CGAGCCUGGUGUUGCUGUUGCUGUUGUCUCG    |
| 41   | 2219  | 36  | 0.682    | GAAAAGCGGAAAAGUUUGAAGA  | 22        | 66 | -4.4               | -1.5                | -32.8               | CGACGAAAAGCGGAAAAGUUUGAAGACGUCG    |
| 42   | 856   | 40  | 0.682    | UUUUCAUCCGUUAUCUUGGGCA  | 22        | 70 | -6.5               | -1.9                | -36.4               | GCCGUUUUCAUCCGUUAUCUUGGGCACGGC     |
| 43   | 1682  | 40  | 0.680    | GUUGAUUAGACAGGAGUGUAUG  | 22        | 68 | -6.2               | -0.4                | -36.5               | CGAGCGUUGAUUAGACAGGAGUGUAUGGCUCG   |
| 44   | 1683  | 40  | 0.679    | CGUUGAUUAGACAGGAGUGUAU  | 22        | 69 | -6.2               | -0.4                | -36.3               | CGAGCCGUUGAUUAGACAGGAGUGUAUGCUCG   |
| 45   | 857   | 45  | 0.679    | CUUUUCAUCCGUUAUCUUGGGC  | 22        | 71 | -6.5               | -1.9                | -37.4               | CGACGCUUUUCAUCCGUUAUCUUGGGCCGUCG   |
| 46   | 2217  | 36  | 0.674    | AAAGCGGAAAAGUUUGAAGAGA  | 22        | 67 | -4.4               | -1.5                | -33.5               | CGACGAAAGCGGAAAAGUUUGAAGAGACGUCG   |
| 47   | 2218  | 36  | 0.672    | AAAAGCGGAAAAGUUUGAAGAG  | 22        | 66 | -4.4               | -1.5                | -32.5               | CGACGAAAAGCGGAAAAGUUUGAAGAGCGUCG   |
| 48   | 855   | 45  | 0.670    | UUUCAUCCGUUAUCUUGGGCAC  | 22        | 72 | -6.5               | -1.9                | -38.2               | CGACGUUUUCAUCCGUUAUCUUGGGCACCGUCG  |
| 49   | 2212  | 31  | 0.667    | GGAAAAGUUUGAAGAGAAGUUU  | 22        | 63 | -3                 | 0                   | -31.3               | CGCGAGGAAAAGUUUGAAGAGAAGUUUCGCG    |
| 50   | 858   | 40  | 0.667    | UCUUUCAUCCGUUAUCUUGGG   | 22        | 69 | -5.4               | -1.8                | -35.9               | CGCGAUCUUUCAUCCGUUAUCUUGGGUCGCG    |
| 1    | 2224  | 34  | 0.808    | UUUUGGGAAAAGCGGAAAAGUUU | 23        | 68 | -7                 | -0.7                | -33.8               | CGACGUUUUGGGAAAAGCGGAAAAGUUUCGUCG  |
| 2    | 80    | 34  | 0.790    | UAAGAUAAUAGGUUUUGGCGGAA | 23        | 69 | -5.9               | -0.4                | -35.4               | CCGGUAAGAUAAUAGGUUUUGGCGGAACCGG    |
| 3    | 81    | 34  | 0.788    | UUAAGAUAAUAGGUUUUGGCGGA | 23        | 69 | -5                 | -0.6                | -35.4               | CCGGUUAAGAUAAUAGGUUUUGGCGGACCGG    |
| 4    | 82    | 39  | 0.776    | CUUAAGAUAAUAGGUUUUGGCGG | 23        | 69 | -5.4               | -0.8                | -36.1               | CGAGCUUAAGAUAAUAGGUUUUGGCGGCUCG    |
| 5    | 2223  | 39  | 0.774    | UUUGGGAAAAGCGGAAAAGUUUG | 23        | 69 | -5.4               | -1.5                | -35.5               | CGCGAUUUGGGAAAAGCGGAAAAGUUUGUCGCG  |
| 6    | 83    | 34  | 0.764    | ACUUAAGAUAAUAGGUUUUGGCG | 23        | 67 | -5.4               | -0.8                | -34.5               | CGACGACUUAAGAUAAUAGGUUUUGGCGGUCG   |
| 7    | 2222  | 39  | 0.741    | UUGGGAAAAGCGGAAAAGUUUGA | 23        | 70 | -4.4               | -1.5                | -36.5               | CCGGUUGGGAAAAGCGGAAAAGUUUGACCGG    |
| 8    | 1218  | 43  | 0.735    | UCGUUGUAGGUUCCACUGGUUAA | 23        | 73 | -6.4               | -0.5                | -39.7               | GCCGUCGUUGUAGGUUCCACUGGUUAAACGGC   |
| 9    | 1237  | 43  | 0.734    | GUUAUCGUCAGCAGAGAAUCGU  | 23        | 70 | -4.3               | 0                   | -38.9               | CGCGAGUUAUCGUCAGCAGAGAAUCGUUCGCG   |
| 10   | 1236  | 39  | 0.734    | UUAUCGUCAGCAGAGAAUCGUU  | 23        | 69 | -4.3               | 0                   | -37.1               | GCACGUUAUCGUCAGCAGAGAAUCGUUCGUGC   |
| 11   | 399   | 47  | 0.734    | GUGUUGCUGUUGCUGUUGUAGGU | 23        | 75 | -5.9               | -1.1                | -41.6               | CGCGAGUGUUGCUGUUGCUGUUGUAGGUUCGCG  |
| 12   | 1235  | 43  | 0.731    | UAAUCGUCAGCAGAGAAUCGUUG | 23        | 70 | -7.1               | -1.3                | -38.8               | CGCGAUAAUCGUCAGCAGAGAAUCGUUGUCGCG  |
| 13   | 1217  | 43  | 0.724    | CGUUGUAGGUUCCACUGGUUAAA | 23        | 72 | -6.4               | -0.5                | -38.7               | GCACGCGUUGUAGGUUCCACUGGUUAAAACGUGC |
| 14   | 2813  | 34  | 0.722    | UUUCAUUGCAGCUUGUUAUAGG  | 23        | 68 | -6                 | 0                   | -35.2               | GCACGUUUACAUUGCAGCUUGUUAUAGGCGUGC  |
| 15   | 2812  | 34  | 0.719    | UUACAUUGCAGCUUGUUAUAGGA | 23        | 69 | -7                 | 0                   | -36.2               | GCCGUUACAUUGCAGCUUGUUAUAGGACGGC    |
| 16   | 2817  | 34  | 0.718    | GGAUUUUACAUUGCAGCUUGUUA | 23        | 67 | -6                 | 0                   | -35.1               | GCACGGGAUUUUACAUUGCAGCUUGUUAACGUGC |
| 17   | 2811  | 39  | 0.714    | UACAUUGCAGCUUGUUAUAGGAC | 23        | 70 | -7                 | 0                   | -38                 | GCACGUACAUUGCAGCUUGUUAUAGGACCGUGC  |
| 18   | 2818  | 34  | 0.712    | UGGAUUUACAUUGCAGCUUGUU  | 23        | 68 | -6                 | 0                   | -35.4               | GCACGUGGAUUUACAUUGCAGCUUGUUCGUGC   |
| 19   | 1216  | 39  | 0.711    | GUUGUAGGUUCCACUGGUUAAAA | 23        | 70 | -6.4               | -0.5                | -37.2               | GCACGGUUGUAGGUUCCACUGGUUAAAACGUGC  |
| 20   | 2820  | 34  | 0.710    | UUUGGAUUUACAUUGCAGCUUG  | 23        | 67 | -5.1               | 0                   | -34.6               | GCACGUUUGGAUUUACAUUGCAGCUUGCGUGC   |
| 21   | 2819  | 34  | 0.708    | UUGGAUUUACAUUGCAGCUUGU  | 23        | 68 | -5.4               | 0                   | -35.4               | GCACGUUGGAUUUACAUUGCAGCUUGUCGUGC   |
| 22   | 2221  | 39  | 0.707    | UGGAAAAGCGGAAAAGUUUGAA  | 23        | 70 | -4.4               | -1.5                | -36.5               | CCGGUGGGAAAAGCGGAAAAGUUUGAACCGG    |
| 23   | 2220  | 43  | 0.701    | GGAAAAGCGGAAAAGUUUGAAG  | 23        | 70 | -4.4               | -1.5                | -37.5               | CGACGGGAAAAGCGGAAAAGUUUGAAGCGUCG   |

| Rank | Base# | %GC | ss-count | Probe sequence           | probe len | Tm | ΔGbimol | ΔGunimol | ΔGduplex | Molecular beacon sequence           |
|------|-------|-----|----------|--------------------------|-----------|----|---------|----------|----------|-------------------------------------|
| 24   | 1215  | 34  | 0.696    | UUGUAGGUUCCACUGGUUAAAAU  | 23        | 69 | -6.4    | -0.5     | -35.6    | GCACGUUGUAGGUUCCACUGGUUAAAAUCGUGC   |
| 25   | 2215  | 39  | 0.696    | AAGCGGAAAAGUUUGAAGAGAAG  | 23        | 68 | -3.6    | -1.1     | -36.1    | CGACGAAGCGGAAAAGUUUGAAGAGAAGCGUCG   |
| 26   | 398   | 47  | 0.696    | UGUUGCUGUUGCUGUUGUAGGUG  | 23        | 74 | -5.9    | -1.1     | -41.5    | GCACGUGUUGCUGUUGCUGUUGUAGGUGCGUGC   |
| 27   | 1238  | 43  | 0.694    | AGUUAUUCGUCAGCAGAGAAUCG  | 23        | 70 | -4.3    | 0        | -38.8    | GCACGAGUUAUUCGUCAGCAGAGAAUCGCGUGC   |
| 28   | 2219  | 39  | 0.694    | GGAAAAGCGGAAAAGUUUGAAGA  | 23        | 69 | -4.4    | -1.5     | -36.1    | CGACGGGAAAAGCGGAAAAGUUUGAAGACGUCG   |
| 29   | 402   | 47  | 0.687    | CUGGUGUUGCUGUUGCUGUUGUA  | 23        | 74 | -6.7    | -1.1     | -41.5    | CGAGCCUGGUGUUGCUGUUGCUGUUGUAGCUCG   |
| 30   | 2216  | 34  | 0.687    | AAAGCGGAAAAGUUUGAAGAGAA  | 23        | 67 | -4.4    | -1.5     | -34.4    | CGACGAAAGCGGAAAAGUUUGAAGAGAACGUCG   |
| 31   | 2218  | 39  | 0.684    | GAAAAGCGGAAAAGUUUGAAGAG  | 23        | 67 | -4.4    | -1.5     | -35.4    | CGACGAAAAGCGGAAAAGUUUGAAGAGCGUCG    |
| 32   | 2217  | 34  | 0.682    | AAAAGCGGAAAAGUUUGAAGAGA  | 23        | 67 | -4.4    | -1.5     | -34.4    | CGACGAAAAGCGGAAAAGUUUGAAGAGACGUCG   |
| 33   | 1214  | 39  | 0.677    | UGUAGGUUCCACUGGUUAAAAUC  | 23        | 70 | -6.4    | -0.5     | -37.6    | GCACGUGUAGGUUCCACUGGUUAAAAUCGUGC    |
| 34   | 855   | 43  | 0.677    | UUUUCAUCCGUUAUCUUGGGCAC  | 23        | 72 | -6.5    | -1.9     | -39.1    | CGACGUUUUCAUCCGUUAUCUUGGGCACCGUCG   |
| 35   | 856   | 43  | 0.675    | CUUUUCAUCCGUUAUCUUGGGCA  | 23        | 71 | -6.5    | -1.9     | -39      | CGACGCUUUUCAUCCGUUAUCUUGGGCACGUCG   |
| 36   | 857   | 43  | 0.672    | UCUUUCAUCCGUUAUCUUGGGC   | 23        | 71 | -6.5    | -1.9     | -39.3    | CGACGUCUUUCAUCCGUUAUCUUGGGCCGUCG    |
| 37   | 854   | 47  | 0.666    | UUUCAUCCGUUAUCUUGGGCACG  | 23        | 73 | -6.5    | -1.9     | -40.6    | CGCGAUUUUCAUCCGUUAUCUUGGGCACGUCGCG  |
| 38   | 2214  | 39  | 0.665    | AGCGGAAAAGUUUGAAGAGAAGU  | 23        | 70 | -2.8    | 0        | -36.9    | CGCCAGCGGAAAAGUUUGAAGAGAAGUGGCG     |
| 39   | 397   | 47  | 0.658    | GUUGCUGUUGCUGUUGUAGGUGA  | 23        | 74 | -6.1    | -1.5     | -41.8    | GCACGGUUGCUGUUGCUGUUGUAGGUGACGUGC   |
| 40   | 1239  | 43  | 0.655    | GAGUUAUUCGUCAGCAGAGAAUC  | 23        | 69 | -4.3    | 0        | -39.3    | CCGGAGUUAUUCGUCAGCAGAGAAUCCGG       |
| 41   | 1684  | 39  | 0.654    | UUCGUUGAUUAGACAGGAGUGUA  | 23        | 69 | -6.5    | -0.4     | -38      | GCCGUUCGUUGAUUAGACAGGAGUGUACGGC     |
| 42   | 1682  | 43  | 0.652    | CGUUGAUUAGACAGGAGUGUAUG  | 23        | 69 | -6.2    | -0.4     | -38.9    | CGAGCGUUGAUUAGACAGGAGUGUAUGCUCG     |
| 43   | 1683  | 39  | 0.651    | UCGUUGAUUAGACAGGAGUGUAU  | 23        | 70 | -6.2    | -0.4     | -38.2    | CGAGCUCGUUGAUUAGACAGGAGUGUAUGCUCG   |
| 44   | 1681  | 39  | 0.651    | GUUGAUUAGACAGGAGUGUAUGU  | 23        | 69 | -6.6    | -0.4     | -38.2    | CGCGAGUUGAUUAGACAGGAGUGUAUGUUCGCG   |
| 45   | 858   | 43  | 0.641    | GUCUUUCAUCCGUUAUCUUGGG   | 23        | 70 | -5.4    | -1.8     | -38.6    | CGACGGUCUUUCAUCCGUUAUCUUGGGCGUCG    |
| 46   | 2212  | 34  | 0.640    | CGGAAAAGUUUGAAGAGAAGUUU  | 23        | 66 | -3      | 0        | -33.7    | CGACGCGGAAAAGUUUGAAGAGAAGUUUCGUCG   |
| 47   | 90    | 34  | 0.640    | UUCACGGACUUAAGAUAAUAGGU  | 23        | 68 | -7.1    | -1       | -35.8    | CGAGCUUCACGGACUUAAGAUAAUAGGUGCUCG   |
| 48   | 966   | 34  | 0.638    | UGGUAGAAUUGUUGAGAUGCUU   | 23        | 68 | -4.6    | 0        | -35.9    | GCACGUGGUAGAAUUGUUGAGAUGCUUCGUGC    |
| 49   | 2213  | 39  | 0.635    | GCGGAAAAGUUUGAAGAGAAGUU  | 23        | 69 | -2.8    | 0        | -36.2    | CGCGAGCGGAAAAGUUUGAAGAGAAGUUUCGCG   |
| 50   | 91    | 34  | 0.624    | UUUCACGGACUUAAGAUAAUAGG  | 23        | 67 | -5.4    | 0        | -35      | CGCGAUUUCACGGACUUAAGAUAAUAGGUCGCG   |
| 1    | 80    | 33  | 0.788    | UUAAGAUAAUAGGUUUUGGCGGAA | 24        | 69 | -5.9    | -0.6     | -36.3    | CCGUUAAGAUAAUAGGUUUUGGCGGAACGG      |
| 2    | 2223  | 37  | 0.784    | UUUUGGGAAAAGCGGAAAAGUUUG | 24        | 69 | -7      | -1.5     | -36.4    | CGCGAUUUUGGGAAAAGCGGAAAAGUUUGUCGCG  |
| 3    | 81    | 37  | 0.774    | CUUAAGAUAAUAGGUUUUGGCGGA | 24        | 70 | -5.4    | -0.8     | -38      | CGACGCUUAAGAUAAUAGGUUUUGGCGGACGUCG  |
| 4    | 82    | 37  | 0.763    | ACUUAAGAUAAUAGGUUUUGGCGG | 24        | 70 | -5.4    | -0.8     | -37.8    | CGACGACUUAAGAUAAUAGGUUUUGGCGGCGUCG  |
| 5    | 2222  | 37  | 0.751    | UUUGGAAAAGCGGAAAAGUUUGA  | 24        | 70 | -5.4    | -1.5     | -37.4    | CCGGUUUGGAAAAGCGGAAAAGUUUGACCGG     |
| 6    | 1236  | 41  | 0.743    | GUUAAUCGUCAGCAGAGAAUCGUU | 24        | 70 | -4.3    | 0        | -39.8    | CGCGAGUUAUUCGUCAGCAGAGAAUCGUUUCGCG  |
| 7    | 1235  | 41  | 0.741    | UUAUUCGUCAGCAGAGAAUCGUUG | 24        | 70 | -7.1    | -1.3     | -39.7    | CGCGAUUAAUUCGUCAGCAGAGAAUCGUUGUCGCG |
| 8    | 2813  | 33  | 0.734    | UUUUACAUUGCAGCUUGUUAUAGG | 24        | 68 | -6      | 0        | -36.1    | GCACGUUUUACAUUGCAGCUUGUUAUAGGCGUGC  |
| 9    | 2812  | 33  | 0.731    | UUUACAUUGCAGCUUGUUAUAGGA | 24        | 69 | -7      | 0        | -37.1    | GCCGUUUACAUUGCAGCUUGUUAUAGGACGGC    |
| 10   | 1217  | 41  | 0.730    | UCGUUGUAGGUUCCACUGGUUAAA | 24        | 72 | -6.4    | -0.5     | -40.6    | GCCGUCGUUGUAGGUUCCACUGGUUAAACGGC    |
| 11   | 2816  | 33  | 0.728    | GGAUUUUACAUUGCAGCUUGUUAU | 24        | 68 | -6      | 0        | -36.2    | CGCGAGGAUUUACAUUGCAGCUUGUUAUUCGCG   |
| 12   | 2811  | 37  | 0.726    | UUACAUUGCAGCUUGUUAUAGGAC | 24        | 70 | -7      | 0        | -38.9    | GCACGUUACAUUGCAGCUUGUUAUAGGACCGUGC  |
| 13   | 2817  | 33  | 0.724    | UGGAUUUACAUUGCAGCUUGUUA  | 24        | 68 | -6      | 0        | -36.7    | GCCGUGGAUUUACAUUGCAGCUUGUUAACGGC    |
| 14   | 2818  | 33  | 0.720    | UUGGAUUUACAUUGCAGCUUGUU  | 24        | 68 | -6      | 0        | -36.3    | GCACGUUGGAUUUACAUUGCAGCUUGUUCGUGC   |
| 15   | 1216  | 41  | 0.719    | CGUUGUAGGUUCCACUGGUUAAAA | 24        | 72 | -6.4    | -0.5     | -39.6    | GCACGCGUUGUAGGUUCCACUGGUUAAACGUGC   |
| 16   | 2221  | 37  | 0.719    | UUGGAAAAGCGGAAAAGUUUGAA  | 24        | 70 | -4.4    | -1.5     | -37.4    | CCGUUGGAAAAGCGGAAAAGUUUGAACGG       |

| Rank | Base# | %GC | ss-count | Probe sequence             | probe len | Tm | $\Delta G_{bimol}$ | $\Delta G_{unimol}$ | $\Delta G_{duplex}$ | Molecular beacon sequence            |
|------|-------|-----|----------|----------------------------|-----------|----|--------------------|---------------------|---------------------|--------------------------------------|
| 17   | 2220  | 41  | 0.708    | UGGAAAAGCGGAAAAGUUUGAAG    | 24        | 71 | -4.4               | -1.5                | -39.1               | CGCGAUGGGAAAAGCGGAAAAGUUUGAAGUCGCG   |
| 18   | 1215  | 37  | 0.707    | GUUGUAGGUUCCACUGGUUAAAAU   | 24        | 70 | -6.4               | -0.5                | -38.3               | CGCGAGUUGUAGGUUCCACUGGUUAAAAUUCGCG   |
| 19   | 1237  | 41  | 0.706    | AGUUAAUCGUCAGCAGAGAAUCGU   | 24        | 71 | -4.3               | 0                   | -40.5               | CGCCAGUUAAUCGUCAGCAGAGAAUCGUGGCG     |
| 20   | 398   | 50  | 0.703    | GUGUUGCUGUUGCUGUUGUAGGUG   | 24        | 75 | -5.9               | -1.1                | -44.2               | CGAGCGUGUUGCUGUUGCUGUUGUAGGUGGCG     |
| 21   | 2219  | 41  | 0.702    | GGGAAAAGCGGAAAAGUUUGAAGA   | 24        | 71 | -4.4               | -1.5                | -39.4               | CGACGGGAAAAGCGGAAAAGUUUGAAGACGUCG    |
| 22   | 2215  | 37  | 0.700    | AAAGCGGAAAAGUUUGAAGAGAAG   | 24        | 68 | -4.4               | -1.5                | -37                 | CGACGAAAGCGGAAAAGUUUGAAGAGAAGCGUCG   |
| 23   | 2218  | 41  | 0.696    | GGAAAAGCGGAAAAGUUUGAAGAG   | 24        | 70 | -4.4               | -1.5                | -38.7               | CGACGGGAAAAGCGGAAAAGUUUGAAGAGCGUCG   |
| 24   | 2217  | 37  | 0.694    | GAAAAGCGGAAAAGUUUGAAGAGA   | 24        | 68 | -4.4               | -1.5                | -37.3               | CGACGAAAAGCGGAAAAGUUUGAAGAGACGUCG    |
| 25   | 2216  | 33  | 0.694    | AAAAGCGGAAAAGUUUGAAGAGAA   | 24        | 67 | -4.4               | -1.5                | -35.3               | CGACGAAAAGCGGAAAAGUUUGAAGAGAACGUCG   |
| 26   | 1214  | 37  | 0.690    | UUGUAGGUUCCACUGGUUAAAAUC   | 24        | 70 | -6.4               | -0.5                | -38.5               | GCACGUUGUAGGUUCCACUGGUUAAAAUCGUCG    |
| 27   | 2820  | 33  | 0.684    | UUUUGGAUUUUACAUUGCAGCUUG   | 24        | 67 | -5.1               | 0                   | -35.5               | GCACGUUUUGGAUUUUACAUUGCAGCUUGCGUCG   |
| 28   | 2819  | 33  | 0.683    | UUUGGAUUUUACAUUGCAGCUUGU   | 24        | 68 | -5.4               | 0                   | -36.3               | GCACGUUUUGGAUUUUACAUUGCAGCUUGCGUCG   |
| 29   | 854   | 45  | 0.673    | UUUUCAUCCGUUAUCUUGGGCACG   | 24        | 73 | -6.5               | -1.9                | -41.5               | CGCGAUUUUCAUCCGUUAUCUUGGGCACGUCGCG   |
| 30   | 2214  | 37  | 0.672    | AAGCGGAAAAGUUUGAAGAGAAGU   | 24        | 70 | -3.6               | -1.1                | -37.8               | CGCCAAGCGGAAAAGUUUGAAGAGAAGUGGCG     |
| 31   | 855   | 45  | 0.671    | CUUUUCAUCCGUUAUCUUGGGCAC   | 24        | 73 | -6.5               | -1.9                | -41.7               | CGACGCUUUUCAUCCGUUAUCUUGGGCACCGUCG   |
| 32   | 1238  | 45  | 0.668    | GAGUUAUCGUCAGCAGAGAAUCG    | 24        | 71 | -4.3               | 0                   | -41.7               | GCACGGAGUUAUCGUCAGCAGAGAAUCGCGUCG    |
| 33   | 856   | 41  | 0.668    | UCUUUCAUCCGUUAUCUUGGGCA    | 24        | 72 | -6.5               | -1.9                | -40.9               | GCCGUCUUUCAUCCGUUAUCUUGGGCACGGC      |
| 34   | 397   | 45  | 0.667    | UGUUGCUGUUGCUGUUGUAGGUGA   | 24        | 75 | -6.1               | -1.5                | -43.4               | GCCGUGUUGCUGUUGCUGUUGUAGGUGACGGC     |
| 35   | 1683  | 37  | 0.663    | UUCGUUGAUUAGACAGGAGUGUAU   | 24        | 69 | -6.5               | -0.4                | -39.1               | CGAGCUUCGUUGAUUAGACAGGAGUGUAUCGUCG   |
| 36   | 857   | 45  | 0.647    | GUCUUUCAUCCGUUAUCUUGGGC    | 24        | 73 | -6.5               | -1.9                | -42                 | CGAGGUCUUUCAUCCGUUAUCUUGGGCCUCG      |
| 37   | 2213  | 37  | 0.642    | AGCGGAAAAGUUUGAAGAGAAGUU   | 24        | 70 | -2.8               | 0                   | -37.8               | CGCCAGCGGAAAAGUUUGAAGAGAAGUUGGCG     |
| 38   | 90    | 33  | 0.634    | UUUCACGGACUUAAGAUAAUAGGU   | 24        | 68 | -7.1               | -1                  | -36.7               | CGAGCUUUCACGGACUUAAGAUAAUAGGUGCUCG   |
| 39   | 1684  | 37  | 0.629    | UUUCGUUGAUUAGACAGGAGUGUA   | 24        | 69 | -6.5               | -0.8                | -38.9               | GCCGUUUCGUUGAUUAGACAGGAGUGUACGGC     |
| 40   | 1239  | 45  | 0.629    | CGAGUUAUCGUCAGCAGAGAAUC    | 24        | 71 | -6.3               | -0.9                | -41.7               | GCACGCGAGUUAUCGUCAGCAGAGAAUCGUGC     |
| 41   | 1682  | 41  | 0.626    | UCGUUGAUUAGACAGGAGUGUAUG   | 24        | 70 | -6.2               | -0.4                | -40.8               | CGCGAUCGUUGAUUAGACAGGAGUGUAUGUCGCG   |
| 42   | 1681  | 41  | 0.625    | CGUUGAUUAGACAGGAGUGUAUGU   | 24        | 71 | -6.6               | -0.4                | -40.6               | CGAGCCGUUGAUUAGACAGGAGUGUAUGUCGUCG   |
| 43   | 858   | 45  | 0.622    | GGUCUUUCAUCCGUUAUCUUGGG    | 24        | 72 | -5.4               | -1.8                | -41.9               | CGACGGGUCUUUCAUCCGUUAUCUUGGGCGUCG    |
| 44   | 966   | 37  | 0.621    | CUGGUAGAAUUGUUGAGAUGCUU    | 24        | 69 | -5                 | 0                   | -38.5               | GCACGCUUGUAGAAUUGUUGAGAUGCUUCGUCG    |
| 45   | 578   | 45  | 0.621    | UUGUCGUCAGUGGAAAUGGAUUG    | 24        | 73 | -5.1               | -0.3                | -42.1               | CGCGAUUGUCGUCAGUGGAAAUGGAUUGUCGCG    |
| 46   | 91    | 33  | 0.618    | UUUUCACGGACUUAAGAUAAUAGG   | 24        | 67 | -5.4               | 0                   | -35.9               | CGCGAUUUUCACGGACUUAAGAUAAUAGGUCGCG   |
| 47   | 2211  | 33  | 0.618    | CGGAAAAGUUUGAAGAGAAGUUUU   | 24        | 66 | -5                 | -0.7                | -34.6               | CGACGCGGAAAAGUUUGAAGAGAAGUUUUCGUCG   |
| 48   | 2212  | 37  | 0.614    | GCGGAAAAGUUUGAAGAGAAGUUU   | 24        | 69 | -3                 | 0                   | -37.1               | CGCGAGCGGAAAAGUUUGAAGAGAAGUUUUCGCG   |
| 49   | 965   | 37  | 0.614    | UGGUAGAAUUGUUGAGAUGCUUC    | 24        | 69 | -4.6               | 0                   | -38.8               | GCACGUGGUAGAAUUGUUGAGAUGCUUCCGUCG    |
| 50   | 860   | 37  | 0.613    | UUGGUCUUUCAUCCGUUAUCUUG    | 24        | 68 | -4                 | -0.2                | -37.8               | CGCGAUUGGUCUUUCAUCCGUUAUCUUGUCGCG    |
| 1    | 2222  | 36  | 0.761    | UUUUGGGAAAAGCGGAAAAGUUUGA  | 25        | 70 | -7                 | -1.5                | -38.3               | CCGUUUUGGGAAAAGCGGAAAAGUUUGACCGG     |
| 2    | 1235  | 44  | 0.750    | GUUAAUCGUCAGCAGAGAAUCGUUG  | 25        | 71 | -7.1               | -1.3                | -42.4               | GCACGGUUAUCGUCAGCAGAGAAUCGUUGCGUCG   |
| 3    | 2813  | 32  | 0.745    | AUUUUACAUUGCAGCUUGUUUAUAGG | 25        | 68 | -6                 | 0                   | -37.2               | GCACGAUUUUACAUUGCAGCUUGUUUAUAGGCGUCG |
| 4    | 2814  | 32  | 0.742    | GAUUUUACAUUGCAGCUUGUUUAUAG | 25        | 66 | -6                 | 0                   | -36.8               | GCACGGAUUUUACAUUGCAGCUUGUUUAUAGCGUCG |
| 5    | 2812  | 32  | 0.742    | UUUUACAUUGCAGCUUGUUUAUAGGA | 25        | 69 | -7                 | 0                   | -38                 | GCCGUUUUUACAUUGCAGCUUGUUUAUAGGACGGC  |
| 6    | 2815  | 32  | 0.738    | GAUUUUACAUUGCAGCUUGUUUAUA  | 25        | 68 | -6                 | 0                   | -37.5               | GCACGGAUUUUUACAUUGCAGCUUGUUUAUACGUCG |
| 7    | 2811  | 36  | 0.737    | UUUACAUUGCAGCUUGUUUAUAGGAC | 25        | 70 | -7                 | 0                   | -39.8               | GCACGUUUACAUUGCAGCUUGUUUAUAGGACCGUCG |
| 8    | 2816  | 32  | 0.734    | UGGAUUUUACAUUGCAGCUUGUUUAU | 25        | 69 | -6                 | 0                   | -37.8               | GCACGUGGAUUUUACAUUGCAGCUUGUUUAUCGUCG |
| 9    | 2817  | 32  | 0.732    | UUGGAUUUUACAUUGCAGCUUGUUA  | 25        | 68 | -6                 | 0                   | -37.6               | GCCGUUGGAUUUUACAUUGCAGCUUGUUACGGC    |

| Rank | Base# | %GC | ss-count | Probe sequence             | probe len | Tm | $\Delta G_{bimol}$ | $\Delta G_{unimol}$ | $\Delta G_{duplex}$ | Molecular beacon sequence            |
|------|-------|-----|----------|----------------------------|-----------|----|--------------------|---------------------|---------------------|--------------------------------------|
| 10   | 2221  | 36  | 0.730    | UUUGGGAAAAGCGGAAAAGUUUGAA  | 25        | 70 | -5.4               | -1.5                | -38.3               | CCGUUUGGGAAAAGCGGAAAAGUUUGAACGG      |
| 11   | 1216  | 40  | 0.725    | UCGUUGUAGGUUCCACUGGUUAAAA  | 25        | 72 | -6.4               | -0.5                | -41.5               | GCCGUCGUUGUAGGUUCCACUGGUUAAAACGGC    |
| 12   | 2220  | 40  | 0.720    | UUGGGAAAAGCGGAAAAGUUUGAAG  | 25        | 71 | -4.4               | -1.5                | -40                 | CGCGAUUGGGAAAAGCGGAAAAGUUUGAAGUCGCG  |
| 13   | 1236  | 40  | 0.716    | AGUUAUCGUCAGCAGAGAAUCGUU   | 25        | 71 | -4.3               | 0                   | -41.4               | CGCCAGUUAUCGUCAGCAGAGAAUCGUUGGCG     |
| 14   | 1215  | 40  | 0.715    | CGUUGUAGGUUCCACUGGUUAAAAU  | 25        | 72 | -6.4               | -0.5                | -40.7               | GCACGCGUUGUAGGUUCCACUGGUUAAAUCGUGC   |
| 15   | 2219  | 40  | 0.708    | UGGGAAAAGCGGAAAAGUUUGAAGA  | 25        | 72 | -4.4               | -1.5                | -41                 | CCGGUGGGAAAAGCGGAAAAGUUUGAAGACCGG    |
| 16   | 2215  | 36  | 0.706    | AAAAGCGGAAAAGUUUGAAGAGAAG  | 25        | 68 | -4.4               | -1.5                | -37.9               | GCACGAAAAGCGGAAAAGUUUGAAGAGAAGCGUCG  |
| 17   | 2217  | 40  | 0.705    | GGAAAAGCGGAAAAGUUUGAAGAGA  | 25        | 71 | -4.4               | -1.5                | -40.6               | GCACGGGAAAAGCGGAAAAGUUUGAAGAGACGUCG  |
| 18   | 2216  | 36  | 0.705    | GAAAAGCGGAAAAGUUUGAAGAGAA  | 25        | 68 | -4.4               | -1.5                | -38.2               | GCACGGAAAAGCGGAAAAGUUUGAAGAGAACGUCG  |
| 19   | 2218  | 44  | 0.703    | GGGAAAAGCGGAAAAGUUUGAAGAG  | 25        | 72 | -4.4               | -1.5                | -42                 | GCACGGGAAAAGCGGAAAAGUUUGAAGAGCGUCG   |
| 20   | 1214  | 40  | 0.701    | GUUGUAGGUUCCACUGGUUAAAAUC  | 25        | 71 | -6.4               | -0.5                | -41.2               | CGAGGUUGUAGGUUCCACUGGUUAAAUCUCG      |
| 21   | 2818  | 32  | 0.695    | UUUGGAUUUUACAUUGCAGCUUGUU  | 25        | 68 | -6                 | 0                   | -37.2               | GCACGUUUGGAUUUUACAUUGCAGCUUGUUCGUGC  |
| 22   | 1237  | 44  | 0.680    | GAGUUAUCGUCAGCAGAGAAUCGU   | 25        | 72 | -4.3               | 0                   | -43.4               | CGCGAGAGUUAUCGUCAGCAGAGAAUCGUUCGCG   |
| 23   | 2214  | 36  | 0.677    | AAAGCGGAAAAGUUUGAAGAGAAGU  | 25        | 70 | -4.4               | -1.5                | -38.7               | CGCCAAAGCGGAAAAGUUUGAAGAGAAGUGGCG    |
| 24   | 397   | 48  | 0.675    | GUGUUGCUGUUGCUGUUGUAGGUGA  | 25        | 76 | -6.1               | -1.5                | -46.1               | CGAGCGUGUUGCUGUUGCUGUUGUAGGUGAGCUCG  |
| 25   | 854   | 48  | 0.667    | CUUUUCAUCCGUUAUCUUGGGCACG  | 25        | 74 | -6.5               | -1.9                | -44.1               | CGAGCUUUUCAUCCGUUAUCUUGGGCACGCUCG    |
| 26   | 855   | 44  | 0.665    | UCUUUCAUCCGUUAUCUUGGGCAC   | 25        | 73 | -6.5               | -1.9                | -43.6               | CGACGUCUUUCAUCCGUUAUCUUGGGCACCGUCG   |
| 27   | 2820  | 32  | 0.661    | UUUUUGGAUUUUACAUUGCAGCUUG  | 25        | 67 | -5.1               | 0                   | -36.4               | GCACGUUUUUGGAUUUUACAUUGCAGCUUGCGUGC  |
| 28   | 2819  | 32  | 0.659    | UUUUGGAUUUUACAUUGCAGCUUGU  | 25        | 68 | -5.4               | 0                   | -37.2               | GCACGUUUUUGGAUUUUACAUUGCAGCUUGUCGUGC |
| 29   | 2213  | 36  | 0.650    | AAGCGGAAAAGUUUGAAGAGAAGUU  | 25        | 70 | -3.6               | -1.1                | -38.7               | CCGAAGCGGAAAAGUUUGAAGAGAAGUUCGG      |
| 30   | 1238  | 48  | 0.643    | CGAGUUAUCGUCAGCAGAGAAUCG   | 25        | 73 | -6.3               | -0.9                | -44.1               | GGCGAGUUAUCGUCAGCAGAGAAUCGCC         |
| 31   | 1682  | 40  | 0.639    | UUCGUUGAUUAGACAGGAGUGUAUG  | 25        | 70 | -6.5               | -0.4                | -41.7               | CGCGAUUCGUUGAUUAGACAGGAGUGUAUGUCGCG  |
| 32   | 1683  | 36  | 0.639    | UUUCGUUGAUUAGACAGGAGUGUAU  | 25        | 69 | -6.5               | -0.8                | -40                 | CGAGCUUUCGUUGAUUAGACAGGAGUGUAUGCUCG  |
| 33   | 90    | 32  | 0.628    | UUUUCACGGACUUAAGAUAAUAGGU  | 25        | 68 | -7.1               | -1                  | -37.6               | CGAGCUUUUCACGGACUUAAGAUAAUAGGUGCUCG  |
| 34   | 857   | 48  | 0.628    | GGUCUUUUCAUCCGUUAUCUUGGGC  | 25        | 75 | -6.5               | -1.9                | -45.3               | CGAGGGUCUUUUCAUCCGUUAUCUUGGGCCUCG    |
| 35   | 859   | 40  | 0.623    | UUGGUCUUUUCAUCCGUUAUCUUGG  | 25        | 71 | -6                 | -1.7                | -41.1               | CGCGAUUGGUCUUUUCAUCCGUUAUCUUGGUCGCG  |
| 36   | 2212  | 36  | 0.622    | AGCGGAAAAGUUUGAAGAGAAGUUU  | 25        | 70 | -3                 | 0                   | -38.7               | CGCCAGCGGAAAAGUUUGAAGAGAAGUUUGGCG    |
| 37   | 567   | 48  | 0.619    | GUGGAAAUGGAUUGCCCGUCAGUUU  | 25        | 76 | -6                 | -2.1                | -45.4               | CGCGAGUGGAAAUGGAUUGCCCGUCAGUUUUCGCG  |
| 38   | 566   | 44  | 0.617    | UGGAAAUGGAUUGCCCGUCAGUUUU  | 25        | 75 | -7.3               | -2.1                | -43.6               | GCACGUGGAAAUGGAUUGCCCGUCAGUUUUCGUGC  |
| 39   | 91    | 32  | 0.613    | UUUUUCACGGACUUAAGAUAAUAGG  | 25        | 67 | -5.4               | 0                   | -36.8               | CGCGAUUUUUCACGGACUUAAGAUAAUAGGUCGCG  |
| 40   | 568   | 48  | 0.608    | AGUGGAAAUGGAUUGCCCGUCAGUU  | 25        | 77 | -6                 | -2.1                | -46.1               | CGCCAGUGGAAAUGGAUUGCCCGUCAGUUGGCG    |
| 41   | 1239  | 48  | 0.606    | CCGAGUUAUCGUCAGCAGAGAAUC   | 25        | 73 | -6.3               | -1.3                | -45                 | GCACGCCGAGUUAUCGUCAGCAGAGAAUCGUGC    |
| 42   | 1684  | 40  | 0.606    | CUUUCGUUGAUUAGACAGGAGUGUA  | 25        | 70 | -7.4               | -1.9                | -41.5               | CGAGCCUUCGUUGAUUAGACAGGAGUGUAUGCUCG  |
| 43   | 966   | 40  | 0.605    | GCUGGUAGAAAUUGUUGAGAUGCUU  | 25        | 72 | -5.4               | 0                   | -41.9               | CGCGAGCUGGUAGAAAUUGUUGAGAUGCUUUCGCG  |
| 44   | 92    | 32  | 0.601    | CUUUUUCACGGACUUAAGAUAAUAG  | 25        | 65 | -5.4               | 0                   | -36.1               | CCGCUUUUUCACGGACUUAAGAUAAUAGCGG      |
| 45   | 1681  | 40  | 0.601    | UCGUUGAUUAGACAGGAGUGUAUGU  | 25        | 72 | -6.6               | -0.4                | -42.5               | CGAGCUCGUUGAUUAGACAGGAGUGUAUGUCUCG   |
| 46   | 965   | 40  | 0.599    | CUGGUAGAAAUUGUUGAGAUGCUUC  | 25        | 70 | -5                 | 0                   | -41.4               | GCACGUCUGGUAGAAAUUGUUGAGAUGCUUCCGUGC |
| 47   | 860   | 40  | 0.597    | CUUGGUCUUUUCAUCCGUUAUCUUG  | 25        | 69 | -4                 | -0.2                | -40.4               | CGAGCUUGGUCUUUUCAUCCGUUAUCUUGCUCG    |
| 48   | 578   | 48  | 0.597    | GUUGUCGUCAGUGGAAAUGGAUUG   | 25        | 74 | -5.7               | -0.3                | -44.8               | GCACGGUUGUCGUCAGUGGAAAUGGAUUGCGUGC   |
| 49   | 967   | 40  | 0.595    | UGCUGGUAGAAAUUGUUGAGAUGCU  | 25        | 72 | -7.4               | 0                   | -42.6               | GCACGUCUGGUAGAAAUUGUUGAGAUGCUCGUGC   |
| 50   | 2211  | 36  | 0.595    | GCGGAAAAGUUUGAAGAGAAGUUUU  | 25        | 69 | -6.1               | -0.7                | -38                 | CGCGAGCGGAAAAGUUUGAAGAGAAGUUUUCGCG   |
| 1    | 2813  | 34  | 0.752    | GAUUUUACAUUGCAGCUUGUUAUAGG | 26        | 69 | -6                 | 0                   | -40.1               | GCACGGAUUUUACAUUGCAGCUUGUUAUAGGCGUGC |
| 2    | 2814  | 34  | 0.747    | GGAUUUUACAUUGCAGCUUGUUAUAG | 26        | 69 | -6                 | 0                   | -40.1               | GCACGGGAUUUUACAUUGCAGCUUGUUAUAGCGUGC |

| Rank | Base# | %GC | ss-count | Probe sequence              | probe len | Tm | ΔG <b>bimol</b> | ΔG <b>unimol</b> | ΔG <b>duplex</b> | Molecular beacon sequence             |
|------|-------|-----|----------|-----------------------------|-----------|----|-----------------|------------------|------------------|---------------------------------------|
| 3    | 2811  | 34  | 0.747    | UUUUACAUUGCAGCUUGUUUAGGAC   | 26        | 70 | -7              | 0                | -40.7            | GCACGUUUUACAUUGCAGCUUGUUUAGGACCGUGC   |
| 4    | 2221  | 34  | 0.741    | UUUUGGGAAAAGCGGAAAAGUUUGAA  | 26        | 70 | -7              | -1.5             | -39.2            | CCGUUUUGGGAAAAGCGGAAAAGUUUGAACGG      |
| 5    | 2220  | 38  | 0.731    | UUUGGGAAAAGCGGAAAAGUUUGAAG  | 26        | 71 | -5.4            | -1.5             | -40.9            | CGCGAUUUUGGGAAAAGCGGAAAAGUUUGAAGUCGCG |
| 6    | 1235  | 42  | 0.723    | AGUUAUUCGUCAGCAGAGAAUCGUUG  | 26        | 72 | -7.1            | -1.3             | -44              | GCACGAGUUAUUCGUCAGCAGAGAAUCGUUGCGUGC  |
| 7    | 1215  | 38  | 0.721    | UCGUUGUAGGUUCCACUGGUUAAAAU  | 26        | 72 | -6.4            | -0.5             | -42.6            | GCACGUCGUUGUAGGUUCCACUGGUUAAAAUCGUGC  |
| 8    | 2219  | 38  | 0.720    | UUGGGAAAAGCGGAAAAGUUUGAAGA  | 26        | 72 | -4.4            | -1.5             | -41.9            | CCGGUUGGGAAAAGCGGAAAAGUUUGAAGACCGG    |
| 9    | 2215  | 38  | 0.716    | GAAAAGCGGAAAAGUUUGAAGAGAAG  | 26        | 69 | -4.4            | -1.5             | -40.8            | CGACGGAAAAGCGGAAAAGUUUGAAGAGAAGCGUGC  |
| 10   | 2216  | 38  | 0.715    | GGAAAAGCGGAAAAGUUUGAAGAGAA  | 26        | 71 | -4.4            | -1.5             | -41.5            | CGACGGGAAAAGCGGAAAAGUUUGAAGAGAAGCGUGC |
| 11   | 2217  | 42  | 0.711    | GGGAAAAGCGGAAAAGUUUGAAGAGA  | 26        | 73 | -4.4            | -1.5             | -43.9            | CGACGGGGAAAAGCGGAAAAGUUUGAAGAGACGUGC  |
| 12   | 2218  | 42  | 0.710    | UGGGAAAAGCGGAAAAGUUUGAAGAG  | 26        | 73 | -4.4            | -1.5             | -43.6            | CGCGAUGGGAAAAGCGGAAAAGUUUGAAGAGUCGCG  |
| 13   | 1214  | 42  | 0.708    | CGUUGUAGGUUCCACUGGUUAAAAUC  | 26        | 72 | -6.4            | -0.5             | -43.6            | GCACGCGUUGUAGGUUCCACUGGUUAAAAUCCGUGC  |
| 14   | 1236  | 42  | 0.691    | GAGUUAUUCGUCAGCAGAGAAUCGUU  | 26        | 72 | -4.3            | 0                | -44.3            | CGCGAGAGUUAUUCGUCAGCAGAGAAUCGUUUCGCG  |
| 15   | 2214  | 34  | 0.684    | AAAAGCGGAAAAGUUUGAAGAGAAGU  | 26        | 70 | -4.4            | -1.5             | -39.6            | CGCCAAAAGCGGAAAAGUUUGAAGAGAAGUGGCG    |
| 16   | 854   | 46  | 0.661    | UCUUUUCAUCCGUUAUCUUGGGCACG  | 26        | 75 | -6.5            | -1.9             | -46              | CGCGAUCUUUUCAUCCGUUAUCUUGGGCACGUCGCG  |
| 17   | 2213  | 34  | 0.656    | AAAGCGGAAAAGUUUGAAGAGAAGUU  | 26        | 70 | -4.4            | -1.5             | -39.6            | CCGAAAGCGGAAAAGUUUGAAGAGAAGUUCGG      |
| 18   | 1237  | 46  | 0.655    | CGAGUUAUUCGUCAGCAGAGAAUCGU  | 26        | 74 | -6.3            | -1.2             | -45.8            | GCACGCGAGUUAUUCGUCAGCAGAGAAUCGUCGUGC  |
| 19   | 2212  | 34  | 0.630    | AAGCGGAAAAGUUUGAAGAGAAGUUU  | 26        | 70 | -3.8            | -1.1             | -39.6            | CCGAAGCGGAAAAGUUUGAAGAGAAGUUCGG       |
| 20   | 567   | 46  | 0.623    | AGUGGAAAUGGAUUGCCCGUCAGUUU  | 26        | 77 | -6              | -2.1             | -47              | CGCCAGUGGAAAUGGAUUGCCCGUCAGUUUGGCG    |
| 21   | 566   | 46  | 0.623    | GUGGAAAUGGAUUGCCCGUCAGUUUU  | 26        | 76 | -7.3            | -2.1             | -46.3            | CGCGAGUGGAAAUGGAUUGCCCGUCAGUUUUUCGCG  |
| 22   | 1238  | 50  | 0.620    | CCGAGUUAUUCGUCAGCAGAGAAUCG  | 26        | 75 | -6.3            | -1.3             | -47.4            | CGAGCCGAGUUAUUCGUCAGCAGAGAAUCGCUCG    |
| 23   | 1682  | 38  | 0.617    | UUUCGUUGAUUAGACAGGAGUGUAUG  | 26        | 70 | -6.5            | -0.8             | -42.6            | CGCGAUUUCGUUGAUUAGACAGGAGUGUAUGUCGCG  |
| 24   | 1683  | 38  | 0.617    | CUUUCGUUGAUUAGACAGGAGUGUAU  | 26        | 71 | -7.4            | -1.9             | -42.6            | CGAGCCUUCGUUGAUUAGACAGGAGUGUAUGCUCG   |
| 25   | 1681  | 38  | 0.614    | UUCGUUGAUUAGACAGGAGUGUAUGU  | 26        | 71 | -6.6            | -0.4             | -43.4            | CGAGCUUCGUUGAUUAGACAGGAGUGUAUGUCUCG   |
| 26   | 91    | 34  | 0.610    | CUUUUUCACGGACUUAAGAUAAUAGG  | 26        | 68 | -5.4            | 0                | -39.4            | CGAGCUUUUUCACGGACUUAAGAUAAUAGGCUCG    |
| 27   | 859   | 42  | 0.608    | CUUGGUCUUUUCAUCCGUUAUCUUGG  | 26        | 72 | -6              | -1.7             | -43.7            | CGAGCUUGGUCUUUUCAUCCGUUAUCUUGGCUCG    |
| 28   | 2211  | 34  | 0.603    | AGCGGAAAAGUUUGAAGAGAAGUUUU  | 26        | 70 | -6.1            | -0.7             | -39.6            | CGCCAGCGGAAAAGUUUGAAGAGAAGUUUUGGCG    |
| 29   | 966   | 38  | 0.600    | UGCUGGUAGAAUUGUUGAGAUGC UU  | 26        | 72 | -7.4            | 0                | -43.5            | GCACGUGCUGGUAGAAUUGUUGAGAUGC UUUCGUGC |
| 30   | 92    | 34  | 0.591    | GCUUUUUCACGGACUUAAGAUAAUAG  | 26        | 68 | -5.4            | 0                | -39.5            | CGACGGCUUUUUCACGGACUUAAGAUAAUAGCGUCG  |
| 31   | 1239  | 46  | 0.586    | UCCGAGUUAUUCGUCAGCAGAGAAUC  | 26        | 74 | -6.3            | -1.3             | -46.9            | GCACGUCCGAGUUAUUCGUCAGCAGAGAAUCCGUGC  |
| 32   | 965   | 42  | 0.584    | GCUGGUAGAAUUGUUGAGAUGC UU   | 26        | 72 | -5.4            | 0                | -44.8            | CGAGGCUGGUAGAAUUGUUGAGAUGC UUCCUCG    |
| 33   | 860   | 42  | 0.584    | CCUUGGUCUUUUCAUCCGUUAUCUUG  | 26        | 72 | -4.1            | -0.2             | -43.7            | CGAGCCUUGGUCUUUUCAUCCGUUAUCUUGCUCG    |
| 34   | 964   | 42  | 0.576    | CUGGUAGAAUUGUUGAGAUGC UU    | 26        | 72 | -5              | 0                | -44.7            | GCACGCUUGGUAGAAUUGUUGAGAUGC UUCCCGUGC |
| 35   | 548   | 34  | 0.571    | UCAGUUUUCGAUUAUCACUCUUGAUG  | 26        | 67 | -4.6            | 0                | -40.4            | CGCGAUCAGUUUUCGAUUAUCACUCUUGAUGUCGCG  |
| 36   | 861   | 38  | 0.569    | UCCUUGGUCUUUUCAUCCGUUAUCUU  | 26        | 72 | -4.3            | -0.2             | -43              | CGACGUCCUUGGUCUUUUCAUCCGUUAUCUUCGUGC  |
| 37   | 2574  | 42  | 0.568    | AACGGAAACAGAAAGACGAAAUCGC   | 26        | 72 | -4.3            | 0                | -42.5            | GCAGCAACGGAAACAGAAAGACGAAAUCGCGCUGC   |
| 38   | 1019  | 53  | 0.567    | CGGGGCUGUAGAUGUUGAUGGGUACU  | 26        | 80 | -7.4            | 0                | -51.7            | GCACGCGGGGCUGUAGAUGUUGAUGGGUACUCGUGC  |
| 39   | 963   | 38  | 0.567    | UGGUAGAAUUGUUGAGAUGC UU     | 26        | 72 | -6.8            | -1.6             | -43.7            | GGUGGUAGAAUUGUUGAGAUGC UUCCACC        |
| 40   | 549   | 34  | 0.565    | GUCAGUUUUCGAUUAUCACUCUUGAU  | 26        | 68 | -6.2            | 0                | -40.5            | CGCGAGUCAGUUUUCGAUUAUCACUCUUGAUUCGCG  |
| 41   | 93    | 34  | 0.562    | CGCUUUUUCACGGACUUAAGAUAAUA  | 26        | 69 | -5.4            | 0                | -39.3            | CGACGCGCUUUUUCACGGACUUAAGAUAAUACGUCG  |
| 42   | 2575  | 38  | 0.560    | AAACGGAAACAGAAAGACGAAAUCG   | 26        | 69 | -3.1            | 0                | -40              | GCAGCAAACGGAAACAGAAAGACGAAAUCGGCUGC   |
| 43   | 1017  | 53  | 0.558    | GGGUCUGUAGAUGUUGAUGGGUACUGG | 26        | 79 | -7.2            | 0                | -51.9            | GCACGGGGCUGUAGAUGUUGAUGGGUACUGGGCUGC  |
| 44   | 439   | 42  | 0.553    | GGAUUAUAGUUGCUCUCGAUGAUGG   | 26        | 72 | -5.1            | 0                | -45.4            | GCACGGGAUUAUAGUUGCUCUCGAUGAUGGGCUGC   |
| 45   | 1240  | 42  | 0.553    | AUCCGAGUUAUUCGUCAGCAGAGAAU  | 26        | 73 | -6.3            | -1.3             | -45.1            | CCGAUCCGAGUUAUUCGUCAGCAGAGAAUCGG      |

| Rank | Base# | %GC | ss-count | Probe sequence              | probe len | Tm | ΔG <b>bimol</b> | ΔG <b>unimol</b> | ΔG <b>duplex</b> | Molecular beacon sequence              |
|------|-------|-----|----------|-----------------------------|-----------|----|-----------------|------------------|------------------|----------------------------------------|
| 46   | 438   | 38  | 0.552    | GAUUAUAGUUGCUCUCGAUGAUGGU   | 26        | 71 | -6.4            | 0                | -43.8            | CGCGAGAUUAUAGUUGCUCUCGAUGAUGGUUCGCG    |
| 47   | 863   | 38  | 0.551    | UAUCCUUGGUCUUUUAUCCGUUAUC   | 26        | 71 | -4.3            | -0.2             | -42.9            | CGACGUAUCCUUGGUCUUUUAUCCGUUAUCGUCG     |
| 48   | 547   | 38  | 0.550    | CAGUUUUCGAUUAUCACUCUUGAUGC  | 26        | 69 | -4.1            | 0                | -41.9            | GCACGCAGUUUUCGAUUAUCACUCUUGAUGCCGUGC   |
| 49   | 546   | 34  | 0.550    | AGUUUUCGAUUAUCACUCUUGAUGCU  | 26        | 69 | -4.1            | -0.1             | -40.9            | CCGAGUUUUCGAUUAUCACUCUUGAUGCUCGG       |
| 50   | 862   | 38  | 0.548    | AUCCUUGGUCUUUUAUCCGUUAUCU   | 26        | 72 | -4.3            | -0.2             | -43.2            | CGCCAUCCUUGGUCUUUUAUCCGUUAUCUGGCG      |
| 1    | 2812  | 33  | 0.759    | GAUUUACAUUGCAGCUUGUUUAUAGGA | 27        | 70 | -7              | 0                | -42              | GCACGGAUUUUACAUUGCAGCUUGUUUAUAGGACGUGC |
| 2    | 2813  | 37  | 0.756    | GAUUUACAUUGCAGCUUGUUUAUAGG  | 27        | 71 | -6              | 0                | -43.4            | GCACGGGAUUUACAUUGCAGCUUGUUUAUAGGCGUGC  |
| 3    | 2811  | 33  | 0.756    | AUUUACAUUGCAGCUUGUUUAUAGGAC | 27        | 70 | -7              | 0                | -41.8            | GCACGAUUUACAUUGCAGCUUGUUUAUAGGACCGUGC  |
| 4    | 2814  | 33  | 0.751    | UGGAUUUACAUUGCAGCUUGUUUAUAG | 27        | 70 | -6              | 0                | -41.7            | GCACGUGGAUUUACAUUGCAGCUUGUUUAUAGCGUGC  |
| 5    | 2220  | 37  | 0.741    | UUUUGGGAAAAGCGGAAAAGUUUGAAG | 27        | 71 | -7              | -1.5             | -41.8            | CGCGAUUUUGGGAAAAGCGGAAAAGUUUGAAGUCGCG  |
| 6    | 2219  | 37  | 0.730    | UUUGGGAAAAGCGGAAAAGUUUGAAGA | 27        | 72 | -5.4            | -1.5             | -42.8            | CCGGUUUGGGAAAAGCGGAAAAGUUUGAAGACCGG    |
| 7    | 2215  | 40  | 0.725    | GGAAAAGCGGAAAAGUUUGAAGAGAAG | 27        | 72 | -4.4            | -1.5             | -44.1            | CGACGGGAAAAGCGGAAAAGUUUGAAGAGAAGCGUCG  |
| 8    | 2216  | 40  | 0.720    | GGGAAAAGCGGAAAAGUUUGAAGAGAA | 27        | 73 | -4.4            | -1.5             | -44.8            | CGACGGGGAAAAGCGGAAAAGUUUGAAGAGAACGUCG  |
| 9    | 2218  | 40  | 0.720    | UUGGGAAAAGCGGAAAAGUUUGAAGAG | 27        | 73 | -4.4            | -1.5             | -44.5            | CGCGAUUGGGAAAAGCGGAAAAGUUUGAAGAGUCGCG  |
| 10   | 2217  | 40  | 0.717    | UGGGAAAAGCGGAAAAGUUUGAAGAGA | 27        | 74 | -4.4            | -1.5             | -45.5            | CCGGUGGGAAAAGCGGAAAAGUUUGAAGAGACCGG    |
| 11   | 1214  | 40  | 0.714    | UCGUUGUAGGUUCCACUGGUUAAAUC  | 27        | 73 | -6.4            | -0.5             | -45.5            | GCACGUCGUUGUAGGUUCCACUGGUUAAAUCGUGC    |
| 12   | 1235  | 44  | 0.699    | GAGUUAUCGUCAGCAGAGAAUCGUUG  | 27        | 73 | -7.1            | -1.3             | -46.9            | GCACGGAGUUAUCGUCAGCAGAGAAUCGUUGCGUGC   |
| 13   | 2214  | 37  | 0.694    | GAAAAGCGGAAAAGUUUGAAGAGAAGU | 27        | 71 | -4.4            | -1.5             | -42.5            | CGCGAGAAAAGCGGAAAAGUUUGAAGAGAAGUUCGCG  |
| 14   | 1236  | 44  | 0.667    | CGAGUUAUCGUCAGCAGAGAAUCGUU  | 27        | 73 | -6.3            | -1.2             | -46.7            | GCACGCGAGUUAUCGUCAGCAGAGAAUCGUUCGUGC   |
| 15   | 2213  | 33  | 0.663    | AAAAGCGGAAAAGUUUGAAGAGAAGUU | 27        | 70 | -4.4            | -1.5             | -40.5            | CCGAAAAGCGGAAAAGUUUGAAGAGAAGUUCGG      |
| 16   | 2212  | 33  | 0.637    | AAAGCGGAAAAGUUUGAAGAGAAGUUU | 27        | 70 | -4.6            | -1.5             | -40.5            | GGAAAGCGGAAAAGUUUGAAGAGAAGUUUCC        |
| 17   | 1237  | 48  | 0.633    | CCGAGUUAUCGUCAGCAGAGAAUCGU  | 27        | 76 | -6.3            | -1.6             | -49.1            | GCACGCCGAGUUAUCGUCAGCAGAGAAUCGUCGUGC   |
| 18   | 566   | 44  | 0.626    | AGUGGAAUGGAUUGCCCGUCAGUUUU  | 27        | 76 | -7.3            | -2.1             | -47.9            | CGCCAGUGGAAUGGAUUGCCCGUCAGUUUUGGCG     |
| 19   | 90    | 33  | 0.620    | CUUUUUCACGGACUUAAGAUAAUAGGU | 27        | 69 | -7.1            | -1               | -41.1            | CGAGCCUUUUUCACGGACUUAAGAUAAUAGGUGCUCG  |
| 20   | 2211  | 33  | 0.612    | AAGCGGAAAAGUUUGAAGAGAAGUUUU | 27        | 70 | -6.1            | -1.1             | -40.5            | CCGAAGCGGAAAAGUUUGAAGAGAAGUUUUCGG      |
| 21   | 91    | 37  | 0.600    | GCUUUUUCACGGACUUAAGAUAAUAGG | 27        | 71 | -5.4            | 0                | -42.8            | CGACGGCUUUUUCACGGACUUAAGAUAAUAGGCGUGC  |
| 22   | 1238  | 48  | 0.600    | UCCGAGUUAUCGUCAGCAGAGAAUCG  | 27        | 75 | -6.3            | -1.3             | -49.3            | CGCGAUCCGAGUUAUCGUCAGCAGAGAAUCGUCGCG   |
| 23   | 1682  | 40  | 0.596    | CUUUCGUUGAUUAGACAGGAGUGUAUG | 27        | 71 | -7.4            | -1.9             | -45.2            | CGAGCUUUCGUUGAUUAGACAGGAGUGUAUGCUCG    |
| 24   | 859   | 44  | 0.595    | CCUUGGUCUUUUAUCCGUUAUCUUGG  | 27        | 74 | -6              | -1.7             | -47              | CCGCCUUGGUCUUUUAUCCGUUAUCUUGGCGG       |
| 25   | 1681  | 37  | 0.594    | UUUCGUUGAUUAGACAGGAGUGUAUGU | 27        | 71 | -6.6            | -0.8             | -44.3            | CGAGCUUUCGUUGAUUAGACAGGAGUGUAUGUGCUCG  |
| 26   | 965   | 40  | 0.581    | UGCUGGUAGAAAUUGUUGAGAUGCUUC | 27        | 73 | -7.4            | 0                | -46.4            | GCACGUGCUGGUAGAAAUUGUUGAGAUGCUUCCGUGC  |
| 27   | 860   | 40  | 0.577    | UCCUUGGUCUUUUAUCCGUUAUCUUG  | 27        | 72 | -4.3            | -0.2             | -45.6            | CGCGAUCCUUGGUCUUUUAUCCGUUAUCUUGUCGCG   |
| 28   | 92    | 37  | 0.575    | CGCUUUUUCACGGACUUAAGAUAAUAG | 27        | 70 | -5.4            | 0                | -41.9            | CGAGCGCUUUUUCACGGACUUAAGAUAAUAGCUCG    |
| 29   | 2574  | 40  | 0.569    | AAACGGAAACAGAAAGACGAAAUCGCG | 27        | 72 | -4.3            | 0                | -43.4            | GCAGCAAACGGAAACAGAAAGACGAAAUCGCGCUGC   |
| 30   | 1239  | 44  | 0.566    | AUCCGAGUUAUCGUCAGCAGAGAAUC  | 27        | 74 | -6.3            | -1.3             | -48              | GCACGAUCCGAGUUAUCGUCAGCAGAGAAUCGUGC    |
| 31   | 862   | 37  | 0.564    | UAUCCUUGGUCUUUUAUCCGUUAUCU  | 27        | 72 | -4.3            | -0.2             | -44.5            | CGACGUAUCCUUGGUCUUUUAUCCGUUAUCUCGUGC   |
| 32   | 964   | 44  | 0.563    | GCUGGUAGAAAUUGUUGAGAUGCUUCC | 27        | 74 | -5.4            | 0                | -48.1            | CGAGGCUUGUAGAAAUUGUUGAGAUGCUUCCUCG     |
| 33   | 861   | 37  | 0.562    | AUCCUUGGUCUUUUAUCCGUUAUCUU  | 27        | 72 | -4.3            | -0.2             | -44.1            | CGCCAUCCUUGGUCUUUUAUCCGUUAUCUUGGCG     |
| 34   | 547   | 37  | 0.558    | UCAGUUUUCGAUUAUCACUCUUGAUGC | 27        | 70 | -4.6            | 0                | -43.8            | GCACGUCAGUUUUCGAUUAUCACUCUUGAUGCCGUGC  |
| 35   | 863   | 37  | 0.557    | AUAUCCUUGGUCUUUUAUCCGUUAUC  | 27        | 71 | -4.3            | -0.2             | -44              | CGACGAUAUCCUUGGUCUUUUAUCCGUUAUCGUGC    |
| 36   | 546   | 37  | 0.557    | CAGUUUUCGAUUAUCACUCUUGAUGCU | 27        | 70 | -4.4            | -0.4             | -43.5            | GCACGCAGUUUUCGAUUAUCACUCUUGAUGCUCGUGC  |
| 37   | 1240  | 40  | 0.556    | AAUCCGAGUUAUCGUCAGCAGAGAAU  | 27        | 73 | -6.3            | -1.3             | -46              | CGCAAUCCGAGUUAUCGUCAGCAGAGAAUGGCG      |
| 38   | 545   | 37  | 0.554    | AGUUUUCGAUUAUCACUCUUGAUGCUC | 27        | 70 | -4.1            | -0.2             | -43.8            | CGACGAGUUUUCGAUUAUCACUCUUGAUGCUCGUGC   |



| Rank | Base# | %GC | ss-count | Probe sequence                 | probe len | Tm | $\Delta G_{bimol}$ | $\Delta G_{unimol}$ | $\Delta G_{duplex}$ | Molecular beacon sequence               |
|------|-------|-----|----------|--------------------------------|-----------|----|--------------------|---------------------|---------------------|-----------------------------------------|
| 39   | 963   | 40  | 0.554    | CUGGUAGAAAUUGUUGAGAUGCUCUCCA   | 27        | 73 | -6.8               | -1.6                | -46.3               | GCACGCUGGUAGAAAUUGUUGAGAUGCUCUCCACGUGC  |
| 40   | 438   | 40  | 0.553    | GGAUUAUAGUUGCUCUCGAUGAUGGU     | 27        | 73 | -6.4               | 0                   | -47.1               | CGCGAGGAUAUAUAGUUGCUCUCGAUGAUGGUUCGCG   |
| 41   | 544   | 40  | 0.552    | GUUUUCGAUAUUCACUCUUGAUGCUCG    | 27        | 71 | -5.4               | -1.2                | -44.6               | CGACGGUUUUCGAUAUUCACUCUUGAUGCUCGCGUCG   |
| 42   | 437   | 40  | 0.551    | GAUAUAUAGUUGCUCUCGAUGAUGGUC    | 27        | 72 | -7                 | -0.2                | -46.7               | CCGGAUAUAUAGUUGCUCUCGAUGAUGGUCCGG       |
| 43   | 864   | 37  | 0.550    | GAUAUCCUUGGUCUUUUCAUCCGUUAU    | 27        | 71 | -6.5               | -0.2                | -44                 | CGCGAGUAUCCUUGGUCUUUUCAUCCGUUAUUCGCG    |
| 44   | 2573  | 44  | 0.547    | AACGGAAACAGAAAGACGAAAUCGCG     | 27        | 73 | -4.3               | 0                   | -44.9               | GCAGCAACGGAAACAGAAAGACGAAAUCGCGGUCG     |
| 45   | 1019  | 51  | 0.546    | UCGGGGCUGUAGAUGUUGAUGGGUACU    | 27        | 80 | -7.4               | 0                   | -53.6               | GCACGUCGGGGCUGUAGAUGUUGAUGGGUACUCGUGC   |
| 46   | 549   | 37  | 0.545    | CGUCAGUUUUCGAUAUUCACUCUUGAU    | 27        | 69 | -6.8               | 0                   | -42.9               | GCACGCGUCAGUUUUCGAUAUUCACUCUUGAUCGUGC   |
| 47   | 2575  | 40  | 0.539    | CAAACGGAAACAGAAAGACGAAAUCG     | 27        | 70 | -3.1               | 0                   | -42.6               | CGAGCAAACGGAAACAGAAAGACGAAAUCGUCG       |
| 48   | 439   | 44  | 0.533    | CGGAUAUAUAGUUGCUCUCGAUGAUGG    | 27        | 74 | -5.1               | 0                   | -47.8               | CGAGCGGAUAUAUAGUUGCUCUCGAUGAUGGUCG      |
| 49   | 2572  | 48  | 0.526    | ACGGAAACAGAAAGACGAAAUCGCGC     | 27        | 76 | -5.7               | 0                   | -47.4               | GCAGCACGGAAACAGAAAGACGAAAUCGCGCGCUCG    |
| 50   | 1241  | 40  | 0.526    | UAAUCCGAGUUAUUCGUCAGCAGAGAA    | 27        | 73 | -6.3               | -1.3                | -46.2               | GCCGUAAUCCGAGUUAUUCGUCAGCAGAGAACGGC     |
| 1    | 2812  | 35  | 0.763    | GGAUUUUACAUUGCAGCUUGUUUAUAGGA  | 28        | 72 | -7                 | 0                   | -45.3               | GCACGGGAUUUUACAUUGCAGCUUGUUUAUAGGACGUGC |
| 2    | 2811  | 35  | 0.763    | GAUUUUACAUUGCAGCUUGUUUAUAGGAC  | 28        | 71 | -7                 | 0                   | -44.7               | CGAGGAUUUUACAUUGCAGCUUGUUUAUAGGACCUCG   |
| 3    | 2813  | 35  | 0.760    | UGGAUUUUACAUUGCAGCUUGUUUAUAGG  | 28        | 72 | -6                 | 0                   | -45                 | GCACGUGGAUUUUACAUUGCAGCUUGUUUAUAGGCGUGC |
| 4    | 2814  | 32  | 0.757    | UUGGAUUUUACAUUGCAGCUUGUUUAUAG  | 28        | 70 | -6                 | 0                   | -42.6               | GCACGUUGGAUUUUACAUUGCAGCUUGUUUAUAGCGUGC |
| 5    | 2219  | 35  | 0.740    | UUUUGGGAAAAGCGGAAAAGUUUGAAGA   | 28        | 72 | -7                 | -1.5                | -43.7               | CCGGUUUUGGGAAAAGCGGAAAAGUUUGAAGACCGG    |
| 6    | 2215  | 42  | 0.730    | GGGAAAAGCGGAAAAGUUUGAAGAGAAG   | 28        | 74 | -4.4               | -1.5                | -47.4               | CGACGGGAAAAGCGGAAAAGUUUGAAGAGAAGCGUGC   |
| 7    | 2218  | 39  | 0.730    | UUUGGGAAAAGCGGAAAAGUUUGAAGAG   | 28        | 73 | -5.4               | -1.5                | -45.4               | CGCGAUUUGGGAAAAGCGGAAAAGUUUGAAGAGUCGCG  |
| 8    | 2217  | 39  | 0.727    | UUGGGAAAAGCGGAAAAGUUUGAAGAGA   | 28        | 73 | -4.4               | -1.5                | -46.4               | CCGGUUGGGAAAAGCGGAAAAGUUUGAAGAGACCGG    |
| 9    | 2216  | 39  | 0.726    | UGGGAAAAGCGGAAAAGUUUGAAGAGAA   | 28        | 73 | -4.4               | -1.5                | -46.4               | CCGGUGGGAAAAGCGGAAAAGUUUGAAGAGAACCGG    |
| 10   | 2214  | 39  | 0.704    | GGAAAAGCGGAAAAGUUUGAAGAGAAGU   | 28        | 73 | -4.4               | -1.5                | -45.8               | CGCGAGGAAAAGCGGAAAAGUUUGAAGAGAAGUUCGCG  |
| 11   | 2213  | 35  | 0.674    | GAAAAGCGGAAAAGUUUGAAGAGAAGUU   | 28        | 70 | -4.4               | -1.5                | -43.4               | CGCGAGAAAAGCGGAAAAGUUUGAAGAGAAGUUUCGCG  |
| 12   | 1236  | 46  | 0.645    | CCGAGUUAUUCGUCAGCAGAGAAUCGUU   | 28        | 75 | -6.3               | -1.6                | -50                 | GCACGCCGAGUUAUUCGUCAGCAGAGAAUCGUUCGUGC  |
| 13   | 2212  | 32  | 0.644    | AAAAGCGGAAAAGUUUGAAGAGAAGUUU   | 28        | 70 | -4.6               | -1.5                | -41.4               | GGAAAAGCGGAAAAGUUUGAAGAGAAGUUUCC        |
| 14   | 2211  | 32  | 0.619    | AAAGCGGAAAAGUUUGAAGAGAAGUUUU   | 28        | 70 | -6.2               | -1.5                | -41.4               | GGAAAGCGGAAAAGUUUGAAGAGAAGUUUCC         |
| 15   | 1237  | 46  | 0.613    | UCCGAGUUAUUCGUCAGCAGAGAAUCGU   | 28        | 76 | -6.3               | -1.6                | -51                 | GCACGUCCGAGUUAUUCGUCAGCAGAGAAUCGUCGUGC  |
| 16   | 90    | 35  | 0.609    | GCUUUUUCACGGACUUAAGAUAAUAGGU   | 28        | 72 | -7.1               | -1                  | -44.5               | CGCGAGCUUUUUCACGGACUUAAGAUAAUAGGUUCGCG  |
| 17   | 859   | 42  | 0.588    | UCCUUGGUCUUUUCAUCCGUUAUCUUGG   | 28        | 74 | -6                 | -1.7                | -48.9               | CGCGAUCCUUGGUCUUUUCAUCCGUUAUCUUGGUCGCG  |
| 18   | 91    | 39  | 0.584    | CGCUUUUUCACGGACUUAAGAUAAUAGG   | 28        | 72 | -5.4               | 0                   | -45.2               | CGAGCGCUUUUUCACGGACUUAAGAUAAUAGGCUCG    |
| 19   | 1238  | 46  | 0.581    | AUCCGAGUUAUUCGUCAGCAGAGAAUCG   | 28        | 75 | -6.3               | -1.3                | -50.4               | GCACGAUCCGAGUUAUUCGUCAGCAGAGAAUCGCGUGC  |
| 20   | 861   | 35  | 0.576    | UAUCCUUGGUCUUUUCAUCCGUUAUCUU   | 28        | 72 | -4.3               | -0.2                | -45.4               | CGACGAUCCUUGGUCUUUUCAUCCGUUAUCUUCGUGC   |
| 21   | 1681  | 39  | 0.575    | CUUUCGUUGAUUAGACAGGAGUGUAUGU   | 28        | 72 | -7.4               | -1.9                | -46.9               | CGAGCCUUCGUUGAUUAGACAGGAGUGUAUGUCUCG    |
| 22   | 860   | 39  | 0.569    | AUCCUUGGUCUUUUCAUCCGUUAUCUUG   | 28        | 73 | -4.3               | -0.2                | -46.7               | CGACGAUCCUUGGUCUUUUCAUCCGUUAUCUUGCGUGC  |
| 23   | 862   | 35  | 0.569    | AUAUCCUUGGUCUUUUCAUCCGUUAUCU   | 28        | 72 | -4.3               | -0.2                | -45.6               | CGCCAUAUCCUUGGUCUUUUCAUCCGUUAUCUGGCG    |
| 24   | 1239  | 42  | 0.568    | AAUCCGAGUUAUUCGUCAGCAGAGAAUC   | 28        | 74 | -6.3               | -1.3                | -48.9               | GCACGAAUCCGAGUUAUUCGUCAGCAGAGAAUCCGUGC  |
| 25   | 546   | 35  | 0.565    | UCAGUUUUCGAUAUUCACUCUUGAUGCUCU | 28        | 71 | -4.6               | -0.4                | -45.4               | GCACGUCAGUUUUCGAUAUUCACUCUUGAUGCUCGUGC  |
| 26   | 863   | 39  | 0.562    | GAUAUCCUUGGUCUUUUCAUCCGUUAUC   | 28        | 72 | -6.5               | -0.5                | -46.9               | GGGAUAUCCUUGGUCUUUUCAUCCGUUAUCCC        |
| 27   | 545   | 39  | 0.561    | CAGUUUUCGAUAUUCACUCUUGAUGCUC   | 28        | 71 | -5                 | -0.7                | -46.4               | GCACGCAGUUUUCGAUAUUCACUCUUGAUGCUCGUGC   |
| 28   | 544   | 39  | 0.561    | AGUUUUCGAUAUUCACUCUUGAUGCUCG   | 28        | 72 | -5.4               | -1.2                | -46.2               | CGACGAGUUUUCGAUAUUCACUCUUGAUGCUCGCGUGC  |
| 29   | 964   | 42  | 0.560    | UGCUGGUAGAAAUUGUUGAGAUGCUCUCC  | 28        | 75 | -7.4               | 0                   | -49.7               | GCACGUGCUGGUAGAAAUUGUUGAGAUGCUCUCCGUGC  |
| 30   | 437   | 42  | 0.552    | GGAUUAUAUAGUUGCUCUCGAUGAUGGUC  | 28        | 74 | -7                 | -0.2                | -50                 | CGAGGGAUAUAUAGUUGCUCUCGAUGAUGGUCCUCG    |
| 31   | 2574  | 42  | 0.548    | CAAACGGAAACAGAAAGACGAAAUCGCG   | 28        | 73 | -4.3               | 0                   | -46                 | GCAGCCAAACGGAAACAGAAAGACGAAAUCGCGCUCG   |

| Rank | Base# | %GC | ss-count | Probe sequence                | probe len | Tm | $\Delta G_{bimol}$ | $\Delta G_{unimol}$ | $\Delta G_{duplex}$ | Molecular beacon sequence               |
|------|-------|-----|----------|-------------------------------|-----------|----|--------------------|---------------------|---------------------|-----------------------------------------|
| 32   | 2573  | 42  | 0.548    | AAACGGAAACAGAAAGACGAAAUCGCG   | 28        | 73 | -4.3               | 0                   | -45.8               | GCAGCAAACGGAAACAGAAAGACGAAAUCGCGGCUGC   |
| 33   | 963   | 42  | 0.543    | GCUGGUAGAAUUGUUGAGAUGCUUCCA   | 28        | 75 | -6.8               | -1.6                | -49.7               | GCACGGCUGGUAGAAUUGUUGAGAUGCUUCCACGUGC   |
| 34   | 1547  | 42  | 0.539    | UGUUAGAAUCGGCACCAAUCGCAUUAUG  | 28        | 75 | -4.9               | -0.6                | -48.4               | CGCGAUGUUAGAAUCGGCACCAAUCGCAUUAUGUCGCG  |
| 35   | 1240  | 39  | 0.538    | UAAUCCGAGUUAUCGUCAGCAGAGAAU   | 28        | 73 | -6.3               | -1.3                | -47.3               | GCACGUAAUCCGAGUUAUCGUCAGCAGAGAAUCGUGC   |
| 36   | 438   | 42  | 0.533    | CGGAUAUAUAGUUGCUCUCGAUGAUGGU  | 28        | 75 | -6.4               | 0                   | -49.5               | GCACGCGGAUAUAUAGUUGCUCUCGAUGAUGGUCGUGC  |
| 37   | 864   | 39  | 0.533    | CGAUAUCCUUGGUCUUUUCAUCCGUUUAU | 28        | 72 | -7.1               | -0.2                | -46.4               | CGACGCGAUAUCCUUGGUCUUUUCAUCCGUUUAUCGUGC |
| 38   | 2572  | 46  | 0.528    | AACGGAAACAGAAAGACGAAAUCGCGC   | 28        | 76 | -5.7               | 0                   | -48.3               | GCAGCAACGGAAACAGAAAGACGAAAUCGCGCGCUGC   |
| 39   | 549   | 39  | 0.525    | CCGUCAGUUUUCGAUAUUCACUCUUGAU  | 28        | 72 | -6.8               | 0                   | -46.2               | GCACGCCGUCAGUUUUCGAUAUUCACUCUUGAUCGUGC  |
| 40   | 2575  | 42  | 0.522    | GCAAACGGAAACAGAAAGACGAAAUCG   | 28        | 73 | -3.1               | 0                   | -46                 | GCAGCGCAAACGGAAACAGAAAGACGAAAUCGGCUGC   |
| 41   | 2082  | 32  | 0.521    | GACAGCGAAAAAUUGAGAAGUUUAAAUC  | 28        | 67 | -4                 | -0.2                | -41.1               | CCGGACAGCGAAAAAUUGAGAAGUUUAAAUCCGG      |
| 42   | 439   | 42  | 0.516    | ACGGAUAUAUAGUUGCUCUCGAUGAUGG  | 28        | 75 | -5.2               | 0                   | -49.5               | GCACGACGGAUAUAUAGUUGCUCUCGAUGAUGGCGUGC  |
| 43   | 2084  | 32  | 0.516    | CAGACAGCGAAAAAUUGAGAAGUUUAAA  | 28        | 68 | -3.3               | -0.2                | -41.3               | GCACGCAGACAGCGAAAAAUUGAGAAGUUUAAAACGUGC |
| 44   | 364   | 46  | 0.510    | UUGGUGGAAAUCUGAGUGGACGAGAAGA  | 28        | 76 | -6.7               | 0                   | -52.1               | GCCGUUGGUGGAAAUCUGAGUGGACGAGAAGACGGC    |
| 45   | 1546  | 42  | 0.508    | GUUAGAAUCGGCACCAAUCGCAUUAUGU  | 28        | 75 | -4.9               | -0.6                | -48.5               | CGCGAGUUAGAAUCGGCACCAAUCGCAUUAUGUCGCG   |
| 46   | 1241  | 42  | 0.508    | GUAUCCGAGUUAUCGUCAGCAGAGAA    | 28        | 74 | -6.3               | -1.3                | -48.9               | GCACGGUAAUCCGAGUUAUCGUCAGCAGAGAACGUGC   |
| 47   | 2576  | 39  | 0.507    | UGCAAACGGAAACAGAAAGACGAAAUC   | 28        | 72 | -4.1               | 0                   | -45.2               | GCAGCUGCAAACGGAAACAGAAAGACGAAAUCGCGCUGC |
| 48   | 551   | 46  | 0.503    | GCCCGUCAGUUUUCGAUAUUCACUCUUG  | 28        | 75 | -4.5               | 0                   | -49.9               | GCACGGCCCGUCAGUUUUCGAUAUUCACUCUUGCGUGC  |
| 49   | 1159  | 35  | 0.503    | CUCUUCAUUAUGUUCAUGCCGUUAAAUG  | 28        | 70 | -5.2               | 0                   | -43.7               | CGAGCUCUUCAUUAUGUUCAUGCCGUUAAAUGCUCG    |
| 50   | 1160  | 32  | 0.503    | UCUCUUCAUUAUGUUCAUGCCGUUAAAU  | 28        | 70 | -5.2               | 0                   | -43                 | CGACGUCUCUUCAUUAUGUUCAUGCCGUUAAAUCGUGC  |
